# Supplementary material for: Anterior and Posterior Left Inferior Frontal Gyrus Contribute to the Implementation of Grammatical Determiners During Language Production
Source: Front Psychol. 2020 Apr 27;11:685. doi: 10.3389/fpsyg.2020.00685 (PMC7197372; doi:10.3389/fpsyg.2020.00685)
Supplement: Supplementary file 2 [file Data_Sheet_2.csv]

	X	participant	sham.real	area	gram.lex	item	target_filler	accuracy	rt	dur1	dur2	session
1	1	X18063	sham	BA47	lex	baelte	target	1	1.384	0.334	0.639	1
2	2	X18063	sham	BA47	lex	firkant	target	1	1.642	0.282	0.827	1
3	3	X18063	sham	BA47	lex	minus	target	1	1.421	0.272	0.767	1
4	4	X18063	sham	BA47	lex	terning	target	1	0.94	0.248	0.649	1
5	5	X18063	sham	BA47	lex	skaal	filler	1	1.636	0.219	0.714	1
6	6	X18063	sham	BA47	lex	cirkel	target	0	1.085	0.283	0.771	1
7	7	X18063	sham	BA47	lex	baelte	target	1	1.47	0.23	0.65	1
8	8	X18063	sham	BA47	lex	hus	filler	0	0.806	0.298	0.544	1
9	9	X18063	sham	BA47	lex	hjerte	target	1	1.066	0.215	0.555	1
10	10	X18063	sham	BA47	lex	hus	target	1	0.76	0.257	0.57	1
11	11	X18063	sham	BA47	lex	plus	target	1	0.879	0.218	0.771	1
12	12	X18063	sham	BA47	lex	vindue	target	1	0.91	0.233	0.702	1
13	13	X18063	sham	BA47	lex	hat	target	1	1.278	0.242	0.514	1
14	14	X18063	sham	BA47	lex	brev	target	0	1.085	0.2	0.752	1
15	15	X18063	sham	BA47	lex	terning	target	1	0.822	0.275	0.607	1
16	16	X18063	sham	BA47	lex	glas	target	1	0.828	0.283	0.733	1
17	17	X18063	sham	BA47	lex	baelte	filler	1	0.987	0.242	0.548	1
18	18	X18063	sham	BA47	lex	hat	target	1	0.794	0.298	0.582	1
19	19	X18063	sham	BA47	lex	hat	filler	1	0.94	0.298	0.592	1
20	20	X18063	sham	BA47	lex	pil	target	1	0.975	0.295	0.601	1
21	21	X18063	sham	BA47	lex	skaal	target	1	0.957	0.23	0.57	1
22	22	X18063	sham	BA47	lex	skaal	target	1	1.059	0.257	0.567	1
23	23	X18063	sham	BA47	lex	brev	target	1	1.02	0.252	0.626	1
24	24	X18063	sham	BA47	lex	minus	target	1	1.169	0.286	0.851	1
25	25	X18063	sham	BA47	lex	trekant	filler	1	1.032	0.263	0.84	1
26	26	X18063	sham	BA47	lex	hjerte	target	1	1.172	0.291	0.661	1
27	27	X18063	sham	BA47	lex	pil	target	1	0.858	0.378	0.721	1
28	28	X18063	sham	BA47	lex	hus	target	1	1.009	0.317	0.748	1
29	29	X18063	sham	BA47	lex	glas	target	1	1.04	0.283	0.718	1
30	30	X18063	sham	BA47	lex	pil	filler	1	0.926	0.306	0.627	1
31	31	X18063	sham	BA47	lex	plus	target	1	0.73	0.321	0.786	1
32	32	X18063	sham	BA47	lex	bold	target	1	0.957	0.31	0.699	1
33	33	X18063	sham	BA47	lex	hjerte	filler	1	0.891	0.252	0.725	1
34	34	X18063	sham	BA47	lex	vindue	filler	1	0.761	0.298	0.775	1
35	35	X18063	sham	BA47	lex	trekant	target	1	0.772	0.291	0.827	1
36	36	X18063	sham	BA47	lex	trekant	target	1	1.028	0.348	0.782	1
37	37	X18063	sham	BA47	lex	firkant	target	1	0.953	0.344	0.891	1
38	38	X18063	sham	BA47	lex	vindue	target	1	0.972	0.295	0.755	1
39	39	X18063	sham	BA47	lex	bold	target	1	1.119	0.314	0.608	1
40	40	X18063	sham	BA47	lex	cirkel	target	1	0.836	0.306	0.759	1
41	41	X18063	sham	BA47	gram	hjerte	filler	1	1.65	0.26	0.702	1
42	42	X18063	sham	BA47	gram	hjerte	target	1	1.221	0.298	0.589	1
43	43	X18063	sham	BA47	gram	terning	target	1	1.165	0.271	0.611	1
44	44	X18063	sham	BA47	gram	brev	target	1	0.892	0.268	0.514	1
45	45	X18063	sham	BA47	gram	minus	target	1	0.757	0.275	0.867	1
46	46	X18063	sham	BA47	gram	baelte	filler	1	0.925	0.386	0.722	1
47	47	X18063	sham	BA47	gram	vindue	filler	1	1.081	0.374	0.783	1
48	48	X18063	sham	BA47	gram	pil	target	1	0.862	0.332	0.585	1
49	49	X18063	sham	BA47	gram	brev	target	1	0.889	0.261	0.646	1
50	50	X18063	sham	BA47	gram	terning	target	1	0.975	0.185	0.771	1
51	51	X18063	sham	BA47	gram	brev	target	1	1.047	0.272	0.661	1
52	52	X18063	sham	BA47	gram	minus	target	1	1.183	0.261	0.891	1
53	53	X18063	sham	BA47	gram	plus	target	1	0.855	0.34	0.714	1
54	54	X18063	sham	BA47	gram	skaal	target	1	1.059	0.306	0.665	1
55	55	X18063	sham	BA47	gram	skaal	target	1	1.395	0.238	0.684	1
56	56	X18063	sham	BA47	gram	bold	target	1	0.845	0.256	0.618	1
57	57	X18063	sham	BA47	gram	bold	filler	1	1.158	0.389	0.645	1
58	58	X18063	sham	BA47	gram	hus	target	1	1.017	0.248	0.699	1
59	59	X18063	sham	BA47	gram	baelte	target	1	0.833	0.325	0.71	1
60	60	X18063	sham	BA47	gram	hus	target	1	0.929	0.214	0.718	1
61	61	X18063	sham	BA47	gram	cirkel	target	1	1.059	0.298	0.774	1
62	62	X18063	sham	BA47	gram	plus	target	1	1.051	0.276	0.835	1
63	63	X18063	sham	BA47	gram	hus	target	1	1.198	0.264	0.642	1
64	64	X18063	sham	BA47	gram	hjerte	target	1	1.017	0.237	0.741	1
65	65	X18063	sham	BA47	gram	glas	target	1	1.013	0.306	0.555	1
66	66	X18063	sham	BA47	gram	bold	target	1	0.968	0.238	0.687	1
67	67	X18063	sham	BA47	gram	minus	filler	1	0.798	0.378	0.823	1
68	68	X18063	sham	BA47	gram	brev	target	1	0.904	0.302	0.657	1
69	69	X18063	sham	BA47	gram	plus	target	1	0.925	0.305	0.714	1
70	70	X18063	sham	BA47	gram	skaal	filler	1	0.945	0.446	0.729	1
71	71	X18063	sham	BA47	gram	pil	filler	1	0.983	0.348	0.721	1
72	72	X18063	sham	BA47	gram	cirkel	target	0	1.017	0.268	0.699	1
73	73	X18063	sham	BA47	gram	trekant	target	0	1.127	0.195	0.756	1
74	74	X18063	sham	BA47	gram	firkant	target	1	0.862	0.204	0.846	1
75	75	X18063	sham	BA47	gram	glas	target	0	1.024	0.229	0.733	1
76	76	X18063	sham	BA47	gram	hat	filler	1	1.078	0.332	0.58	1
77	77	X18063	sham	BA47	gram	vindue	target	0	1.143	0.237	0.687	1
78	78	X18063	sham	BA47	gram	trekant	target	1	1.025	0.264	0.755	1
79	79	X18063	sham	BA47	gram	firkant	target	0	1.039	0.221	1.206	1
80	80	X18063	sham	BA47	gram	vindue	target	1	1.198	0.249	0.71	1
81	81	X18063	sham	BA44	lex	glas	filler	0	0.998	0.835	0.752	1
82	82	X18063	sham	BA44	lex	baelte	target	0	0.896	0.948	0.676	1
83	83	X18063	sham	BA44	lex	hat	target	1	0.833	0.344	0.63	1
84	84	X18063	sham	BA44	lex	plus	target	1	0.868	0.286	0.771	1
85	85	X18063	sham	BA44	lex	cirkel	filler	1	1.036	0.351	0.854	1
86	86	X18063	sham	BA44	lex	terning	target	1	0.997	0.37	0.767	1
87	87	X18063	sham	BA44	lex	brev	target	1	0.67	0.253	0.672	1
88	88	X18063	sham	BA44	lex	plus	filler	1	0.949	0.438	0.82	1
89	89	X18063	sham	BA44	lex	brev	filler	1	0.86	0.294	0.695	1
90	90	X18063	sham	BA44	lex	bold	filler	1	0.779	0.306	0.725	1
91	91	X18063	sham	BA44	lex	skaal	target	1	1.002	0.325	0.691	1
92	92	X18063	sham	BA44	lex	minus	target	1	0.803	0.225	0.855	1
93	93	X18063	sham	BA44	lex	cirkel	target	0	0.892	0.937	0.642	1
94	94	X18063	sham	BA44	lex	baelte	target	1	1.028	0.238	0.744	1
95	95	X18063	sham	BA44	lex	trekant	target	1	0.994	0.29	0.848	1
96	96	X18063	sham	BA44	lex	minus	filler	0	0.768	0.544	0.801	1
97	97	X18063	sham	BA44	lex	pil	target	1	0.783	0.382	0.744	1
98	98	X18063	sham	BA44	lex	glas	target	1	0.795	0.328	0.725	1
99	99	X18063	sham	BA44	lex	firkant	target	1	0.768	0.237	0.825	1
100	100	X18063	sham	BA44	lex	brev	target	1	0.726	0.294	0.649	1
101	101	X18063	sham	BA44	lex	firkant	target	1	0.692	0.306	0.789	1
102	102	X18063	sham	BA44	lex	vindue	target	1	0.787	0.276	0.744	1
103	103	X18063	sham	BA44	lex	plus	target	1	0.76	0.295	0.789	1
104	104	X18063	sham	BA44	lex	vindue	target	1	0.86	0.233	0.71	1
105	105	X18063	sham	BA44	lex	trekant	target	1	0.806	0.261	0.831	1
106	106	X18063	sham	BA44	lex	terning	target	1	0.681	0.314	0.718	1
107	107	X18063	sham	BA44	lex	terning	filler	1	0.756	0.283	0.748	1
108	108	X18063	sham	BA44	lex	hjerte	target	0	0.902	0.336	0.828	1
109	109	X18063	sham	BA44	lex	hus	target	1	0.887	0.26	0.699	1
110	110	X18063	sham	BA44	lex	cirkel	target	1	1.02	0.336	0.733	1
111	111	X18063	sham	BA44	lex	bold	target	1	1.226	0.294	0.638	1
112	112	X18063	sham	BA44	lex	skaal	target	1	0.873	0.355	0.657	1
113	113	X18063	sham	BA44	lex	glas	target	1	0.887	0.294	0.71	1
114	114	X18063	sham	BA44	lex	hjerte	target	1	0.941	0.314	0.752	1
115	115	X18063	sham	BA44	lex	hat	target	1	0.934	0.295	0.589	1
116	116	X18063	sham	BA44	lex	minus	target	1	0.852	0.241	0.809	1
117	117	X18063	sham	BA44	lex	hus	target	1	0.81	0.233	0.68	1
118	118	X18063	sham	BA44	lex	pil	target	1	0.753	0.234	0.589	1
119	119	X18063	sham	BA44	lex	firkant	filler	1	0.862	0.283	0.884	1
120	120	X18063	sham	BA44	lex	bold	target	1	0.971	0.229	0.588	1
121	121	X18063	sham	BA44	gram	plus	filler	1	0.917	0.302	0.764	1
122	122	X18063	sham	BA44	gram	glas	target	1	1.161	0.219	0.714	1
123	123	X18063	sham	BA44	gram	brev	target	1	1.078	0.29	0.702	1
124	124	X18063	sham	BA44	gram	hjerte	target	1	0.839	0.234	0.737	1
125	125	X18063	sham	BA44	gram	skaal	target	1	1.036	0.234	0.619	1
126	126	X18063	sham	BA44	gram	skaal	target	1	0.86	0.256	0.668	1
127	127	X18063	sham	BA44	gram	bold	target	1	0.86	0.263	0.638	1
128	128	X18063	sham	BA44	gram	trekant	filler	0	1.342	0.816	0.986	1
129	129	X18063	sham	BA44	gram	pil	target	1	1.475	0.221	0.653	1
130	130	X18063	sham	BA44	gram	vindue	target	1	1.179	0.242	0.657	1
131	131	X18063	sham	BA44	gram	firkant	target	1	0.836	0.204	0.846	1
132	132	X18063	sham	BA44	gram	terning	filler	1	1.017	0.306	0.737	1
133	133	X18063	sham	BA44	gram	baelte	target	1	0.968	0.238	0.687	1
134	134	X18063	sham	BA44	gram	brev	filler	0	1.536	0.458	0.848	1
135	135	X18063	sham	BA44	gram	hus	target	1	1.259	0.227	0.733	1
136	136	X18063	sham	BA44	gram	brev	target	1	0.907	0.238	0.646	1
137	137	X18063	sham	BA44	gram	bold	target	1	0.967	0.199	0.676	1
138	138	X18063	sham	BA44	gram	cirkel	filler	1	0.879	0.359	0.798	1
139	139	X18063	sham	BA44	gram	plus	target	1	1.059	0.249	0.861	1
140	140	X18063	sham	BA44	gram	hus	target	1	0.828	0.257	0.737	1
141	141	X18063	sham	BA44	gram	hjerte	target	1	1.032	0.267	0.741	1
142	142	X18063	sham	BA44	gram	plus	target	1	0.836	0.162	0.88	1
143	143	X18063	sham	BA44	gram	minus	target	1	0.866	0.204	0.918	1
144	144	X18063	sham	BA44	gram	terning	target	1	1.414	0.261	0.733	1
145	145	X18063	sham	BA44	gram	cirkel	target	1	0.894	0.199	0.825	1
146	146	X18063	sham	BA44	gram	minus	target	1	0.868	0.199	0.832	1
147	147	X18063	sham	BA44	gram	trekant	target	1	0.81	0.248	0.905	1
148	148	X18063	sham	BA44	gram	glas	target	1	0.925	0.244	0.825	1
149	149	X18063	sham	BA44	gram	trekant	target	1	0.818	0.237	0.912	1
150	150	X18063	sham	BA44	gram	vindue	target	1	0.885	0.28	0.793	1
151	151	X18063	sham	BA44	gram	firkant	target	1	0.696	0.257	0.888	1
152	152	X18063	sham	BA44	gram	terning	target	1	0.822	0.225	0.691	1
153	153	X18063	sham	BA44	gram	cirkel	target	1	1.089	0.276	0.74	1
154	154	X18063	sham	BA44	gram	hat	target	1	0.877	0.261	0.574	1
155	155	X18063	sham	BA44	gram	hus	filler	1	1.006	0.28	0.786	1
156	156	X18063	sham	BA44	gram	baelte	target	1	0.94	0.176	0.691	1
157	157	X18063	sham	BA44	gram	hat	target	1	0.933	0.199	0.596	1
158	158	X18063	sham	BA44	gram	firkant	filler	1	1.013	0.332	0.933	1
159	159	X18063	sham	BA44	gram	pil	target	1	1.187	0.2	0.714	1
160	160	X18063	sham	BA44	gram	glas	filler	1	1.142	0.314	0.82	1
161	161	X18063	real	BA47	lex	bold	target	1	1.139	0.237	0.515	2
162	162	X18063	real	BA47	lex	terning	target	1	1.074	0.23	0.57	2
163	163	X18063	real	BA47	lex	cirkel	target	1	1.009	0.248	0.702	2
164	164	X18063	real	BA47	lex	hat	target	1	0.911	0.223	0.514	2
165	165	X18063	real	BA47	lex	bold	target	1	0.96	0.264	0.627	2
166	166	X18063	real	BA47	lex	plus	target	0	1.028	0.971	0.759	2
167	167	X18063	real	BA47	lex	plus	target	1	1.006	0.212	0.74	2
168	168	X18063	real	BA47	lex	glas	target	1	0.949	0.212	0.684	2
169	169	X18063	real	BA47	lex	hus	target	1	0.9	0.185	0.669	2
170	170	X18063	real	BA47	lex	trekant	target	1	1.459	0.246	0.729	2
171	171	X18063	real	BA47	lex	firkant	target	1	0.948	0.229	0.741	2
172	172	X18063	real	BA47	lex	vindue	target	1	1.678	0.193	0.657	2
173	173	X18063	real	BA47	lex	hus	target	1	1.244	0.17	0.65	2
174	174	X18063	real	BA47	lex	firkant	target	1	1.055	0.212	0.729	2
175	175	X18063	real	BA47	lex	glas	target	1	1.21	0.17	0.714	2
176	176	X18063	real	BA47	lex	vindue	filler	1	0.994	0.202	0.664	2
177	177	X18063	real	BA47	lex	terning	target	1	1.183	0.174	0.619	2
178	178	X18063	real	BA47	lex	hjerte	target	NA	NA	0.865	0.517	2
179	179	X18063	real	BA47	lex	skaal	target	NA	NA	0.612	1.998	2
180	180	X18063	real	BA47	lex	trekant	filler	NA	NA	0.465	0.744	2
181	181	X18063	real	BA47	lex	brev	target	NA	NA	1.364	0.737	2
182	182	X18063	real	BA47	lex	hat	target	NA	NA	0.249	0.351	2
183	183	X18063	real	BA47	lex	minus	target	NA	NA	0.582	1.111	2
184	184	X18063	real	BA47	lex	brev	target	NA	NA	0.676	0.687	2
185	185	X18063	real	BA47	lex	pil	target	NA	NA	0.548	0.495	2
186	186	X18063	real	BA47	lex	pil	filler	NA	NA	0.309	0.718	2
187	187	X18063	real	BA47	lex	trekant	target	NA	NA	0.491	0.359	2
188	188	X18063	real	BA47	lex	minus	target	NA	NA	0.329	0.525	2
189	189	X18063	real	BA47	lex	hjerte	filler	NA	NA	0.622	0.523	2
190	190	X18063	real	BA47	lex	baelte	target	1	1.168	0.2	0.672	2
191	191	X18063	real	BA47	lex	hjerte	target	1	1.127	0.215	0.623	2
192	192	X18063	real	BA47	lex	cirkel	target	1	1.901	0.2	0.646	2
193	193	X18063	real	BA47	lex	hus	filler	1	1.285	0.223	0.57	2
194	194	X18063	real	BA47	lex	baelte	target	1	1.255	0.223	0.589	2
195	195	X18063	real	BA47	lex	pil	target	1	1.036	0.206	0.584	2
196	196	X18063	real	BA47	lex	vindue	target	1	1.3	0.166	0.631	2
197	197	X18063	real	BA47	lex	baelte	filler	1	0.975	0.208	0.517	2
198	198	X18063	real	BA47	lex	hat	filler	1	1.21	0.189	0.502	2
199	199	X18063	real	BA47	lex	skaal	target	1	1.192	0.179	0.603	2
200	200	X18063	real	BA47	lex	skaal	filler	1	1.276	0.199	0.657	2
201	201	X18063	real	BA47	gram	pil	target	1	0.983	0.215	0.65	2
202	202	X18063	real	BA47	gram	firkant	target	1	1.149	0.2	0.842	2
203	203	X18063	real	BA47	gram	hjerte	filler	1	1.139	0.202	0.672	2
204	204	X18063	real	BA47	gram	hus	target	1	1.308	0.178	0.748	2
205	205	X18063	real	BA47	gram	terning	target	1	1.134	0.162	0.725	2
206	206	X18063	real	BA47	gram	skaal	target	1	1.032	0.17	0.706	2
207	207	X18063	real	BA47	gram	baelte	target	1	1.024	0.157	0.783	2
208	208	X18063	real	BA47	gram	skaal	target	1	1.074	0.14	0.65	2
209	209	X18063	real	BA47	gram	trekant	target	0	0.964	0.144	1.356	2
210	210	X18063	real	BA47	gram	baelte	filler	1	1.574	0.286	0.611	2
211	211	X18063	real	BA47	gram	minus	filler	1	1.195	0.219	0.789	2
212	212	X18063	real	BA47	gram	bold	target	1	1.23	0.137	0.63	2
213	213	X18063	real	BA47	gram	vindue	filler	1	1.274	0.223	0.721	2
214	214	X18063	real	BA47	gram	baelte	target	1	1.27	0.212	0.665	2
215	215	X18063	real	BA47	gram	plus	target	1	1.242	0.191	0.752	2
216	216	X18063	real	BA47	gram	vindue	target	1	1.326	0.141	0.71	2
217	217	X18063	real	BA47	gram	brev	target	1	1.349	0.172	0.63	2
218	218	X18063	real	BA47	gram	cirkel	target	1	1.142	0.174	0.68	2
219	219	X18063	real	BA47	gram	hus	target	1	1.421	0.199	0.748	2
220	220	X18063	real	BA47	gram	terning	target	1	1.157	0.159	0.816	2
221	221	X18063	real	BA47	gram	vindue	target	1	1.429	0.174	0.721	2
222	222	X18063	real	BA47	gram	glas	target	1	1.501	0.155	0.737	2
223	223	X18063	real	BA47	gram	trekant	target	1	1.234	0.172	0.84	2
224	224	X18063	real	BA47	gram	bold	filler	1	1.278	0.302	0.763	2
225	225	X18063	real	BA47	gram	cirkel	target	1	1.315	0.264	0.695	2
226	226	X18063	real	BA47	gram	minus	target	1	1.27	0.215	0.91	2
227	227	X18063	real	BA47	gram	hat	target	1	1.238	0.206	0.557	2
228	228	X18063	real	BA47	gram	hjerte	target	1	1.213	0.181	0.631	2
229	229	X18063	real	BA47	gram	firkant	target	1	1.746	0.17	0.839	2
230	230	X18063	real	BA47	gram	hjerte	target	1	0.983	0.185	0.71	2
231	231	X18063	real	BA47	gram	bold	target	1	1.308	0.204	0.601	2
232	232	X18063	real	BA47	gram	pil	target	1	1.081	0.2	0.638	2
233	233	X18063	real	BA47	gram	brev	target	1	1.226	0.16	0.622	2
234	234	X18063	real	BA47	gram	hat	filler	1	1.368	0.234	0.555	2
235	235	X18063	real	BA47	gram	hat	target	1	1.055	0.257	0.661	2
236	236	X18063	real	BA47	gram	minus	target	1	1.059	0.193	0.797	2
237	237	X18063	real	BA47	gram	pil	filler	1	1.226	0.218	0.729	2
238	238	X18063	real	BA47	gram	plus	target	1	1.168	0.212	0.873	2
239	239	X18063	real	BA47	gram	glas	target	1	1.319	0.2	0.808	2
240	240	X18063	real	BA47	gram	skaal	filler	1	1.501	0.23	0.759	2
241	241	X18063	real	BA44	lex	vindue	target	1	0.926	0.185	0.563	2
242	242	X18063	real	BA44	lex	brev	filler	1	0.86	0.191	0.668	2
243	243	X18063	real	BA44	lex	hjerte	target	1	0.933	0.202	0.668	2
244	244	X18063	real	BA44	lex	minus	target	1	0.81	0.191	0.809	2
245	245	X18063	real	BA44	lex	glas	target	1	0.756	0.276	0.684	2
246	246	X18063	real	BA44	lex	hat	target	1	1.232	0.272	0.461	2
247	247	X18063	real	BA44	lex	cirkel	filler	1	0.889	0.268	0.638	2
248	248	X18063	real	BA44	lex	baelte	target	1	0.87	0.196	0.695	2
249	249	X18063	real	BA44	lex	bold	filler	1	0.833	0.225	0.615	2
250	250	X18063	real	BA44	lex	trekant	target	1	0.959	0.202	0.756	2
251	251	X18063	real	BA44	lex	terning	filler	1	0.795	0.221	0.649	2
252	252	X18063	real	BA44	lex	pil	target	1	0.828	0.208	0.521	2
253	253	X18063	real	BA44	lex	minus	target	1	0.975	0.212	0.846	2
254	254	X18063	real	BA44	lex	hus	target	1	0.824	0.215	0.68	2
255	255	X18063	real	BA44	lex	terning	target	1	1.295	0.252	0.607	2
256	256	X18063	real	BA44	lex	hat	target	1	0.828	0.215	0.468	2
257	257	X18063	real	BA44	lex	baelte	target	1	0.814	0.263	0.641	2
258	258	X18063	real	BA44	lex	trekant	target	0	0.915	0.472	0.748	2
259	259	X18063	real	BA44	lex	glas	filler	1	0.822	0.218	0.737	2
260	260	X18063	real	BA44	lex	firkant	target	1	0.949	0.234	0.759	2
261	261	X18063	real	BA44	lex	bold	target	1	0.829	0.241	0.599	2
262	262	X18063	real	BA44	lex	vindue	target	1	0.822	0.221	0.622	2
263	263	X18063	real	BA44	lex	cirkel	target	1	0.948	0.241	0.542	2
264	264	X18063	real	BA44	lex	glas	target	1	0.837	0.237	0.79	2
265	265	X18063	real	BA44	lex	plus	filler	1	0.852	0.221	0.649	2
266	266	X18063	real	BA44	lex	bold	target	1	1.221	0.166	0.574	2
267	267	X18063	real	BA44	lex	brev	target	1	0.9	0.219	0.721	2
268	268	X18063	real	BA44	lex	minus	filler	1	0.817	0.204	0.684	2
269	269	X18063	real	BA44	lex	hus	target	1	0.832	0.215	0.684	2
270	270	X18063	real	BA44	lex	skaal	target	1	0.986	0.237	0.596	2
271	271	X18063	real	BA44	lex	plus	target	1	0.933	0.218	0.771	2
272	272	X18063	real	BA44	lex	terning	target	1	0.953	0.215	0.551	2
273	273	X18063	real	BA44	lex	hjerte	target	1	0.934	0.268	0.593	2
274	274	X18063	real	BA44	lex	firkant	target	0	0.885	0.427	0.752	2
275	275	X18063	real	BA44	lex	cirkel	target	1	0.968	0.264	0.623	2
276	276	X18063	real	BA44	lex	firkant	filler	1	0.814	0.206	0.851	2
277	277	X18063	real	BA44	lex	plus	target	1	0.818	0.206	0.771	2
278	278	X18063	real	BA44	lex	brev	target	1	0.742	0.199	0.588	2
279	279	X18063	real	BA44	lex	pil	target	1	0.883	0.195	0.527	2
280	280	X18063	real	BA44	lex	skaal	target	0	0.784	1.019	0.508	2
281	281	X18063	real	BA44	gram	terning	target	1	0.836	0.204	0.623	2
282	282	X18063	real	BA44	gram	glas	filler	1	1.021	0.272	0.687	2
283	283	X18063	real	BA44	gram	hus	target	1	0.889	0.223	0.778	2
284	284	X18063	real	BA44	gram	hat	target	1	0.832	0.212	0.517	2
285	285	X18063	real	BA44	gram	hus	filler	1	0.917	0.233	0.672	2
286	286	X18063	real	BA44	gram	terning	filler	1	0.915	0.302	0.744	2
287	287	X18063	real	BA44	gram	cirkel	filler	1	0.809	0.234	0.714	2
288	288	X18063	real	BA44	gram	trekant	filler	1	0.986	0.26	0.958	2
289	289	X18063	real	BA44	gram	firkant	target	1	0.997	0.187	0.813	2
290	290	X18063	real	BA44	gram	hjerte	target	1	0.9	0.227	0.703	2
291	291	X18063	real	BA44	gram	minus	target	1	0.904	0.17	0.789	2
292	292	X18063	real	BA44	gram	vindue	target	0	0.968	0.468	0.65	2
293	293	X18063	real	BA44	gram	bold	target	1	0.921	0.16	0.622	2
294	294	X18063	real	BA44	gram	terning	target	1	1.12	0.168	0.668	2
295	295	X18063	real	BA44	gram	hjerte	target	1	0.923	0.178	0.65	2
296	296	X18063	real	BA44	gram	hat	target	1	0.818	0.145	0.599	2
297	297	X18063	real	BA44	gram	skaal	target	1	0.809	0.185	0.653	2
298	298	X18063	real	BA44	gram	skaal	target	1	0.926	0.178	0.593	2
299	299	X18063	real	BA44	gram	trekant	target	1	0.979	0.193	0.831	2
300	300	X18063	real	BA44	gram	brev	filler	1	1.195	0.249	0.718	2
301	301	X18063	real	BA44	gram	brev	target	1	0.944	0.202	0.68	2
302	302	X18063	real	BA44	gram	pil	target	1	0.913	0.172	0.641	2
303	303	X18063	real	BA44	gram	baelte	target	1	1.043	0.234	0.687	2
304	304	X18063	real	BA44	gram	hus	target	1	0.873	0.17	0.763	2
305	305	X18063	real	BA44	gram	baelte	target	1	0.761	0.157	0.699	2
306	306	X18063	real	BA44	gram	plus	target	1	0.803	0.176	0.836	2
307	307	X18063	real	BA44	gram	bold	target	1	0.784	0.237	0.634	2
308	308	X18063	real	BA44	gram	trekant	target	1	0.871	0.16	0.729	2
309	309	X18063	real	BA44	gram	plus	target	1	0.843	0.166	0.771	2
310	310	X18063	real	BA44	gram	glas	target	1	0.741	0.14	0.759	2
311	311	X18063	real	BA44	gram	cirkel	target	1	0.704	0.147	0.714	2
312	312	X18063	real	BA44	gram	minus	target	1	0.787	0.174	0.835	2
313	313	X18063	real	BA44	gram	firkant	filler	1	0.807	0.233	0.89	2
314	314	X18063	real	BA44	gram	cirkel	target	1	0.851	0.159	0.657	2
315	315	X18063	real	BA44	gram	pil	target	1	0.719	0.183	0.622	2
316	316	X18063	real	BA44	gram	glas	target	1	0.745	0.132	0.801	2
317	317	X18063	real	BA44	gram	firkant	target	1	0.745	0.244	0.886	2
318	318	X18063	real	BA44	gram	plus	filler	1	0.972	0.242	0.653	2
319	319	X18063	real	BA44	gram	vindue	target	1	1.244	0.268	0.706	2
320	320	X18063	real	BA44	gram	brev	target	1	0.817	0.212	0.65	2
321	321	X04606	sham	BA47	lex	pil	target	1	0.596	0.198	0.496	2
322	322	X04606	sham	BA47	lex	hus	target	1	0.765	0.174	0.683	2
323	323	X04606	sham	BA47	lex	vindue	target	1	0.696	0.221	0.691	2
324	324	X04606	sham	BA47	lex	plus	target	1	0.568	0.189	0.721	2
325	325	X04606	sham	BA47	lex	hus	target	1	0.585	0.191	0.725	2
326	326	X04606	sham	BA47	lex	cirkel	target	1	0.622	0.197	0.691	2
327	327	X04606	sham	BA47	lex	hat	target	1	0.387	0.176	0.534	2
328	328	X04606	sham	BA47	lex	hjerte	target	1	0.425	0.21	0.618	2
329	329	X04606	sham	BA47	lex	baelte	filler	1	0.471	0.237	0.718	2
330	330	X04606	sham	BA47	lex	trekant	target	1	0.513	0.191	0.928	2
331	331	X04606	sham	BA47	lex	bold	target	1	0.532	0.137	0.702	2
332	332	X04606	sham	BA47	lex	plus	target	1	0.455	0.195	0.767	2
333	333	X04606	sham	BA47	lex	glas	target	1	0.495	0.197	0.667	2
334	334	X04606	sham	BA47	lex	pil	filler	1	0.516	0.244	0.573	2
335	335	X04606	sham	BA47	lex	vindue	target	1	0.406	0.198	0.657	2
336	336	X04606	sham	BA47	lex	trekant	target	1	0.568	0.193	0.922	2
337	337	X04606	sham	BA47	lex	terning	target	1	0.448	0.214	0.71	2
338	338	X04606	sham	BA47	lex	firkant	target	1	0.413	0.202	0.889	2
339	339	X04606	sham	BA47	lex	hjerte	target	1	0.52	0.179	0.66	2
340	340	X04606	sham	BA47	lex	baelte	target	0	0.387	0.17	0.745	2
341	341	X04606	sham	BA47	lex	pil	target	1	0.555	0.191	0.626	2
342	342	X04606	sham	BA47	lex	hjerte	filler	1	0.558	0.256	0.752	2
343	343	X04606	sham	BA47	lex	firkant	target	1	0.413	0.237	0.886	2
344	344	X04606	sham	BA47	lex	vindue	filler	1	0.417	0.225	0.741	2
345	345	X04606	sham	BA47	lex	hus	filler	1	0.49	0.191	0.805	2
346	346	X04606	sham	BA47	lex	glas	target	1	0.425	0.195	0.714	2
347	347	X04606	sham	BA47	lex	skaal	target	1	0.467	0.168	0.66	2
348	348	X04606	sham	BA47	lex	minus	target	1	0.471	0.195	0.947	2
349	349	X04606	sham	BA47	lex	hat	target	1	0.478	0.218	0.557	2
350	350	X04606	sham	BA47	lex	cirkel	target	1	0.503	0.239	0.675	2
351	351	X04606	sham	BA47	lex	skaal	target	1	0.539	0.221	0.66	2
352	352	X04606	sham	BA47	lex	trekant	filler	1	0.49	0.218	0.905	2
353	353	X04606	sham	BA47	lex	terning	target	1	0.483	0.212	0.737	2
354	354	X04606	sham	BA47	lex	skaal	filler	1	0.437	0.204	0.806	2
355	355	X04606	sham	BA47	lex	baelte	target	1	0.513	0.198	0.741	2
356	356	X04606	sham	BA47	lex	brev	target	1	0.421	0.218	0.603	2
357	357	X04606	sham	BA47	lex	hat	filler	1	0.509	0.179	0.683	2
358	358	X04606	sham	BA47	lex	bold	target	1	0.562	0.202	0.679	2
359	359	X04606	sham	BA47	lex	minus	target	1	0.448	0.164	0.866	2
360	360	X04606	sham	BA47	lex	brev	target	1	0.406	0.172	0.634	2
361	361	X04606	sham	BA47	gram	brev	target	1	0.635	0.126	0.557	2
362	362	X04606	sham	BA47	gram	minus	target	1	0.773	0.108	0.826	2
363	363	X04606	sham	BA47	gram	terning	filler	1	0.665	0.187	0.84	2
364	364	X04606	sham	BA47	gram	plus	filler	1	0.6	0.214	0.752	2
365	365	X04606	sham	BA47	gram	trekant	filler	1	0.6	0.233	0.886	2
366	366	X04606	sham	BA47	gram	baelte	target	1	0.549	0.12	0.845	2
367	367	X04606	sham	BA47	gram	trekant	target	1	0.577	0.137	1.015	2
368	368	X04606	sham	BA47	gram	pil	target	1	0.532	0.137	0.649	2
369	369	X04606	sham	BA47	gram	trekant	target	1	0.772	0.107	1.008	2
370	370	X04606	sham	BA47	gram	bold	target	1	0.558	0.141	0.794	2
371	371	X04606	sham	BA47	gram	hjerte	target	1	0.551	0.149	0.783	2
372	372	X04606	sham	BA47	gram	glas	filler	1	0.692	0.225	0.824	2
373	373	X04606	sham	BA47	gram	skaal	target	1	0.557	0.197	0.748	2
374	374	X04606	sham	BA47	gram	hat	target	1	0.584	0.166	0.652	2
375	375	X04606	sham	BA47	gram	brev	target	1	0.532	0.134	0.672	2
376	376	X04606	sham	BA47	gram	vindue	target	1	0.611	0.12	0.787	2
377	377	X04606	sham	BA47	gram	glas	target	0	0.551	0.16	1.458	2
378	378	X04606	sham	BA47	gram	cirkel	target	1	0.638	0.15	0.787	2
379	379	X04606	sham	BA47	gram	terning	target	1	0.638	0.127	0.907	2
380	380	X04606	sham	BA47	gram	glas	target	1	0.614	0.127	0.81	2
381	381	X04606	sham	BA47	gram	hus	target	1	0.558	0.141	0.821	2
382	382	X04606	sham	BA47	gram	cirkel	filler	1	0.635	0.225	0.916	2
383	383	X04606	sham	BA47	gram	terning	target	1	0.703	0.13	0.779	2
384	384	X04606	sham	BA47	gram	vindue	target	1	0.537	0.143	0.799	2
385	385	X04606	sham	BA47	gram	plus	target	1	0.551	0.092	0.939	2
386	386	X04606	sham	BA47	gram	skaal	target	1	0.577	0.13	0.741	2
387	387	X04606	sham	BA47	gram	cirkel	target	1	0.623	0.145	0.84	2
388	388	X04606	sham	BA47	gram	hjerte	target	1	0.539	0.176	0.752	2
389	389	X04606	sham	BA47	gram	firkant	target	1	0.577	0.141	0.992	2
390	390	X04606	sham	BA47	gram	bold	target	1	0.619	0.115	0.718	2
391	391	X04606	sham	BA47	gram	firkant	target	1	0.63	0.158	1.019	2
392	392	X04606	sham	BA47	gram	hat	target	1	0.532	0.164	0.679	2
393	393	X04606	sham	BA47	gram	hus	filler	1	0.585	0.233	0.767	2
394	394	X04606	sham	BA47	gram	plus	target	1	0.526	0.123	0.857	2
395	395	X04606	sham	BA47	gram	firkant	filler	1	0.649	0.216	0.984	2
396	396	X04606	sham	BA47	gram	baelte	target	1	0.585	0.134	0.79	2
397	397	X04606	sham	BA47	gram	brev	filler	1	0.757	0.189	0.694	2
398	398	X04606	sham	BA47	gram	hus	target	1	0.65	0.069	0.958	2
399	399	X04606	sham	BA47	gram	minus	target	1	0.524	0.099	1.05	2
400	400	X04606	sham	BA47	gram	pil	target	1	0.572	0.1	0.799	2
401	401	X04606	sham	BA44	lex	firkant	filler	1	0.677	0.282	0.924	2
402	402	X04606	sham	BA44	lex	hat	target	1	0.591	0.205	0.583	2
403	403	X04606	sham	BA44	lex	hus	target	1	0.543	0.183	0.847	2
404	404	X04606	sham	BA44	lex	bold	filler	1	0.551	0.218	0.977	2
405	405	X04606	sham	BA44	lex	plus	filler	1	0.603	0.255	0.702	2
406	406	X04606	sham	BA44	lex	firkant	target	1	0.487	0.193	0.806	2
407	407	X04606	sham	BA44	lex	minus	filler	1	0.547	0.256	0.729	2
408	408	X04606	sham	BA44	lex	trekant	target	1	0.581	0.214	0.771	2
409	409	X04606	sham	BA44	lex	cirkel	target	1	0.472	0.193	0.752	2
410	410	X04606	sham	BA44	lex	cirkel	filler	1	0.539	0.225	0.813	2
411	411	X04606	sham	BA44	lex	skaal	target	1	0.44	0.221	0.615	2
412	412	X04606	sham	BA44	lex	brev	target	1	0.379	0.176	0.603	2
413	413	X04606	sham	BA44	lex	minus	target	1	0.631	0.179	0.886	2
414	414	X04606	sham	BA44	lex	glas	target	1	0.448	0.191	0.737	2
415	415	X04606	sham	BA44	lex	bold	target	1	0.503	0.204	0.675	2
416	416	X04606	sham	BA44	lex	plus	target	1	0.558	0.191	0.763	2
417	417	X04606	sham	BA44	lex	terning	filler	1	0.471	0.256	0.874	2
418	418	X04606	sham	BA44	lex	vindue	target	1	0.394	0.191	0.767	2
419	419	X04606	sham	BA44	lex	glas	filler	1	0.46	0.258	0.737	2
420	420	X04606	sham	BA44	lex	bold	target	1	0.36	0.221	0.561	2
421	421	X04606	sham	BA44	lex	brev	filler	1	0.448	0.252	0.695	2
422	422	X04606	sham	BA44	lex	brev	target	1	0.471	0.172	0.569	2
423	423	X04606	sham	BA44	lex	hus	target	1	0.547	0.206	0.718	2
424	424	X04606	sham	BA44	lex	hjerte	target	1	0.441	0.135	0.756	2
425	425	X04606	sham	BA44	lex	glas	target	1	0.464	0.181	0.791	2
426	426	X04606	sham	BA44	lex	trekant	target	1	0.474	0.221	0.821	2
427	427	X04606	sham	BA44	lex	terning	target	1	0.383	0.201	0.799	2
428	428	X04606	sham	BA44	lex	baelte	target	1	0.514	0.224	0.718	2
429	429	X04606	sham	BA44	lex	hjerte	target	1	0.46	0.166	0.795	2
430	430	X04606	sham	BA44	lex	hat	target	1	0.463	0.187	0.653	2
431	431	X04606	sham	BA44	lex	vindue	target	1	0.505	0.183	0.714	2
432	432	X04606	sham	BA44	lex	skaal	target	1	0.402	0.191	0.695	2
433	433	X04606	sham	BA44	lex	pil	target	1	0.491	0.228	0.606	2
434	434	X04606	sham	BA44	lex	pil	target	1	0.421	0.206	0.588	2
435	435	X04606	sham	BA44	lex	minus	target	1	0.441	0.193	0.864	2
436	436	X04606	sham	BA44	lex	plus	target	1	0.58	0.193	0.733	2
437	437	X04606	sham	BA44	lex	firkant	target	1	0.467	0.195	0.901	2
438	438	X04606	sham	BA44	lex	terning	target	1	0.53	0.193	0.802	2
439	439	X04606	sham	BA44	lex	baelte	target	1	0.456	0.147	0.721	2
440	440	X04606	sham	BA44	lex	cirkel	target	1	0.398	0.206	0.737	2
441	441	X04606	sham	BA44	gram	hus	target	1	0.63	0.143	0.737	2
442	442	X04606	sham	BA44	gram	plus	target	1	0.537	0.162	0.818	2
443	443	X04606	sham	BA44	gram	terning	target	1	0.576	0.139	0.795	2
444	444	X04606	sham	BA44	gram	baelte	target	1	0.539	0.13	0.817	2
445	445	X04606	sham	BA44	gram	bold	target	1	0.513	0.145	0.653	2
446	446	X04606	sham	BA44	gram	trekant	target	1	0.551	0.149	0.878	2
447	447	X04606	sham	BA44	gram	glas	target	1	0.631	0.134	0.733	2
448	448	X04606	sham	BA44	gram	pil	target	1	0.493	0.168	0.664	2
449	449	X04606	sham	BA44	gram	minus	filler	1	0.627	0.225	0.855	2
450	450	X04606	sham	BA44	gram	minus	target	1	0.711	0.1	0.968	2
451	451	X04606	sham	BA44	gram	firkant	target	1	0.482	0.145	0.962	2
452	452	X04606	sham	BA44	gram	glas	target	1	0.528	0.16	0.752	2
453	453	X04606	sham	BA44	gram	vindue	target	1	0.513	0.176	0.763	2
454	454	X04606	sham	BA44	gram	hat	filler	1	0.599	0.251	0.679	2
455	455	X04606	sham	BA44	gram	hjerte	filler	1	0.524	0.221	0.84	2
456	456	X04606	sham	BA44	gram	brev	target	1	0.539	0.141	0.637	2
457	457	X04606	sham	BA44	gram	pil	filler	1	0.555	0.24	0.695	2
458	458	X04606	sham	BA44	gram	skaal	target	1	0.596	0.157	0.706	2
459	459	X04606	sham	BA44	gram	minus	target	1	0.463	0.16	0.947	2
460	460	X04606	sham	BA44	gram	baelte	target	1	0.564	0.112	0.833	2
461	461	X04606	sham	BA44	gram	hjerte	target	1	0.576	0.147	0.814	2
462	462	X04606	sham	BA44	gram	skaal	filler	1	0.558	0.214	0.821	2
463	463	X04606	sham	BA44	gram	pil	target	1	0.518	0.185	0.667	2
464	464	X04606	sham	BA44	gram	hat	target	1	0.49	0.141	0.615	2
465	465	X04606	sham	BA44	gram	terning	target	1	0.568	0.127	0.814	2
466	466	X04606	sham	BA44	gram	bold	target	1	0.551	0.145	0.645	2
467	467	X04606	sham	BA44	gram	bold	filler	1	0.665	0.252	0.802	2
468	468	X04606	sham	BA44	gram	skaal	target	1	0.503	0.154	0.629	2
469	469	X04606	sham	BA44	gram	hus	target	1	0.553	0.185	0.791	2
470	470	X04606	sham	BA44	gram	vindue	target	1	0.497	0.122	0.844	2
471	471	X04606	sham	BA44	gram	brev	target	1	0.568	0.139	0.733	2
472	472	X04606	sham	BA44	gram	plus	target	1	0.539	0.118	0.855	2
473	473	X04606	sham	BA44	gram	baelte	filler	1	0.626	0.247	0.721	2
474	474	X04606	sham	BA44	gram	firkant	target	1	0.558	0.153	1.038	2
475	475	X04606	sham	BA44	gram	cirkel	target	1	0.497	0.153	0.79	2
476	476	X04606	sham	BA44	gram	trekant	target	1	0.49	0.153	0.977	2
477	477	X04606	sham	BA44	gram	hjerte	target	1	0.514	0.127	0.737	2
478	478	X04606	sham	BA44	gram	hat	target	1	0.44	0.134	0.664	2
479	479	X04606	sham	BA44	gram	cirkel	target	1	0.545	0.158	0.806	2
480	480	X04606	sham	BA44	gram	vindue	filler	1	0.63	0.239	0.891	2
481	481	X04606	real	BA47	lex	glas	target	1	0.78	0.17	0.691	1
482	482	X04606	real	BA47	lex	cirkel	target	1	0.772	0.233	0.687	1
483	483	X04606	real	BA47	lex	bold	target	1	0.631	0.237	0.645	1
484	484	X04606	real	BA47	lex	hus	target	1	0.699	0.197	0.725	1
485	485	X04606	real	BA47	lex	vindue	target	1	0.974	0.149	0.729	1
486	486	X04606	real	BA47	lex	hat	target	1	0.73	0.22	0.571	1
487	487	X04606	real	BA47	lex	plus	target	1	0.73	0.187	0.767	1
488	488	X04606	real	BA47	lex	brev	target	1	0.734	0.202	0.611	1
489	489	X04606	real	BA47	lex	pil	target	1	0.676	0.208	0.559	1
490	490	X04606	real	BA47	lex	firkant	target	1	0.726	0.177	0.903	1
491	491	X04606	real	BA47	lex	hus	filler	1	0.707	0.218	0.84	1
492	492	X04606	real	BA47	lex	hjerte	target	1	0.753	0.187	0.721	1
493	493	X04606	real	BA47	lex	baelte	filler	1	0.842	0.278	0.64	1
494	494	X04606	real	BA47	lex	plus	target	1	0.638	0.195	0.84	1
495	495	X04606	real	BA47	lex	baelte	target	1	0.661	0.179	0.893	1
496	496	X04606	real	BA47	lex	trekant	filler	1	0.795	0.225	0.943	1
497	497	X04606	real	BA47	lex	bold	target	1	0.654	0.214	0.687	1
498	498	X04606	real	BA47	lex	trekant	target	1	0.692	0.189	0.972	1
499	499	X04606	real	BA47	lex	brev	target	1	0.646	0.202	0.611	1
500	500	X04606	real	BA47	lex	vindue	target	1	0.688	0.189	0.66	1
501	501	X04606	real	BA47	lex	terning	target	1	0.7	0.191	0.702	1
502	502	X04606	real	BA47	lex	hjerte	target	1	0.746	0.22	0.621	1
503	503	X04606	real	BA47	lex	minus	target	1	0.669	0.21	0.836	1
504	504	X04606	real	BA47	lex	minus	target	1	0.65	0.172	0.912	1
505	505	X04606	real	BA47	lex	skaal	target	1	0.696	0.214	0.622	1
506	506	X04606	real	BA47	lex	trekant	target	1	0.593	0.191	0.783	1
507	507	X04606	real	BA47	lex	skaal	filler	1	0.711	0.235	0.667	1
508	508	X04606	real	BA47	lex	vindue	filler	1	0.696	0.275	0.76	1
509	509	X04606	real	BA47	lex	terning	target	1	0.585	0.183	0.783	1
510	510	X04606	real	BA47	lex	pil	target	1	0.623	0.233	0.63	1
511	511	X04606	real	BA47	lex	skaal	target	1	0.551	0.21	0.649	1
512	512	X04606	real	BA47	lex	hat	target	1	0.627	0.21	0.55	1
513	513	X04606	real	BA47	lex	cirkel	target	1	0.614	0.204	0.733	1
514	514	X04606	real	BA47	lex	glas	target	1	0.549	0.204	0.652	1
515	515	X04606	real	BA47	lex	hjerte	filler	1	0.745	0.218	0.733	1
516	516	X04606	real	BA47	lex	hus	target	1	0.742	0.216	0.71	1
517	517	X04606	real	BA47	lex	hat	filler	1	0.593	0.206	0.76	1
518	518	X04606	real	BA47	lex	baelte	target	1	0.619	0.237	0.699	1
519	519	X04606	real	BA47	lex	firkant	target	1	0.619	0.206	0.897	1
520	520	X04606	real	BA47	lex	pil	filler	1	0.692	0.225	0.66	1
521	521	X04606	real	BA47	gram	trekant	target	1	0.841	0.111	0.87	1
522	522	X04606	real	BA47	gram	skaal	target	1	0.738	0.153	0.737	1
523	523	X04606	real	BA47	gram	skaal	target	1	0.692	0.206	0.679	1
524	524	X04606	real	BA47	gram	glas	target	1	0.761	0.134	0.748	1
525	525	X04606	real	BA47	gram	minus	target	1	0.738	0.141	0.84	1
526	526	X04606	real	BA47	gram	brev	filler	1	0.78	0.214	0.637	1
527	527	X04606	real	BA47	gram	vindue	target	1	0.8	0.147	0.899	1
528	528	X04606	real	BA47	gram	trekant	filler	1	0.765	0.212	0.884	1
529	529	X04606	real	BA47	gram	hjerte	target	1	0.585	0.111	0.741	1
530	530	X04606	real	BA47	gram	cirkel	target	1	0.635	0.115	0.763	1
531	531	X04606	real	BA47	gram	terning	target	1	0.757	0.123	0.853	1
532	532	X04606	real	BA47	gram	firkant	target	1	0.81	0.137	0.874	1
533	533	X04606	real	BA47	gram	minus	target	1	0.904	0.081	0.953	1
534	534	X04606	real	BA47	gram	plus	filler	1	0.892	0.177	0.714	1
535	535	X04606	real	BA47	gram	baelte	target	1	0.73	0.108	0.729	1
536	536	X04606	real	BA47	gram	firkant	filler	1	0.858	0.197	0.949	1
537	537	X04606	real	BA47	gram	bold	target	1	0.649	0.135	0.687	1
538	538	X04606	real	BA47	gram	pil	target	1	0.627	0.126	0.561	1
539	539	X04606	real	BA47	gram	hus	target	1	0.684	0.096	0.787	1
540	540	X04606	real	BA47	gram	cirkel	filler	1	0.711	0.218	0.748	1
541	541	X04606	real	BA47	gram	brev	target	1	0.719	0.084	0.657	1
542	542	X04606	real	BA47	gram	vindue	target	1	0.635	0.134	0.714	1
543	543	X04606	real	BA47	gram	plus	target	1	0.65	0.095	0.791	1
544	544	X04606	real	BA47	gram	hjerte	target	1	0.646	0.118	0.943	1
545	545	X04606	real	BA47	gram	baelte	target	1	0.642	0.164	0.691	1
546	546	X04606	real	BA47	gram	firkant	target	1	0.672	0.15	0.938	1
547	547	X04606	real	BA47	gram	brev	target	1	0.765	0.158	0.667	1
548	548	X04606	real	BA47	gram	bold	target	1	0.745	0.141	0.699	1
549	549	X04606	real	BA47	gram	glas	target	1	0.719	0.154	0.787	1
550	550	X04606	real	BA47	gram	terning	target	1	0.707	0.206	0.775	1
551	551	X04606	real	BA47	gram	terning	filler	1	0.848	0.26	0.889	1
552	552	X04606	real	BA47	gram	cirkel	target	1	0.65	0.137	0.79	1
553	553	X04606	real	BA47	gram	hat	target	1	0.677	0.195	0.584	1
554	554	X04606	real	BA47	gram	plus	target	1	0.699	0.216	0.802	1
555	555	X04606	real	BA47	gram	glas	filler	1	0.715	0.262	0.745	1
556	556	X04606	real	BA47	gram	hus	target	1	0.684	0.172	0.809	1
557	557	X04606	real	BA47	gram	hus	filler	1	0.703	0.191	0.779	1
558	558	X04606	real	BA47	gram	hat	target	1	0.672	0.147	0.899	1
559	559	X04606	real	BA47	gram	trekant	target	1	0.673	0.172	0.859	1
560	560	X04606	real	BA47	gram	pil	target	1	0.707	0.141	0.699	1
561	561	X04606	real	BA44	lex	firkant	filler	1	0.673	0.175	0.903	1
562	562	X04606	real	BA44	lex	bold	target	1	0.673	0.202	0.641	1
563	563	X04606	real	BA44	lex	firkant	target	1	0.734	0.153	1.118	1
564	564	X04606	real	BA44	lex	minus	filler	1	0.804	0.201	1.019	1
565	565	X04606	real	BA44	lex	minus	target	1	0.657	0.147	0.814	1
566	566	X04606	real	BA44	lex	firkant	target	1	0.635	0.187	0.931	1
567	567	X04606	real	BA44	lex	cirkel	filler	1	0.684	0.198	0.741	1
568	568	X04606	real	BA44	lex	hat	target	1	0.73	0.17	0.652	1
569	569	X04606	real	BA44	lex	brev	filler	1	0.661	0.21	0.714	1
570	570	X04606	real	BA44	lex	plus	target	1	0.7	0.122	0.805	1
571	571	X04606	real	BA44	lex	baelte	target	1	0.814	0.099	0.748	1
572	572	X04606	real	BA44	lex	glas	filler	1	0.742	0.193	0.922	1
573	573	X04606	real	BA44	lex	glas	target	1	0.707	0.141	0.805	1
574	574	X04606	real	BA44	lex	trekant	target	1	0.684	0.195	0.832	1
575	575	X04606	real	BA44	lex	brev	target	1	0.619	0.153	0.668	1
576	576	X04606	real	BA44	lex	bold	target	1	0.635	0.191	0.641	1
577	577	X04606	real	BA44	lex	plus	filler	1	0.646	0.229	0.63	1
578	578	X04606	real	BA44	lex	skaal	target	1	0.596	0.168	0.706	1
579	579	X04606	real	BA44	lex	vindue	target	1	0.73	0.103	0.771	1
580	580	X04606	real	BA44	lex	brev	target	1	0.723	0.193	0.59	1
581	581	X04606	real	BA44	lex	hjerte	target	1	0.814	0.256	0.657	1
582	582	X04606	real	BA44	lex	cirkel	target	1	0.707	0.15	0.795	1
583	583	X04606	real	BA44	lex	baelte	target	1	0.555	0.172	0.798	1
584	584	X04606	real	BA44	lex	terning	target	1	0.585	0.153	0.79	1
585	585	X04606	real	BA44	lex	minus	target	1	0.464	0.139	1.03	1
586	586	X04606	real	BA44	lex	pil	target	1	0.581	0.198	0.618	1
587	587	X04606	real	BA44	lex	trekant	target	1	0.599	0.22	0.922	1
588	588	X04606	real	BA44	lex	hat	target	1	0.68	0.189	0.664	1
589	589	X04606	real	BA44	lex	hus	target	1	0.545	0.231	0.752	1
590	590	X04606	real	BA44	lex	hjerte	target	1	0.593	0.191	0.721	1
591	591	X04606	real	BA44	lex	pil	target	1	0.65	0.202	0.63	1
592	592	X04606	real	BA44	lex	cirkel	target	1	0.673	0.221	0.733	1
593	593	X04606	real	BA44	lex	bold	filler	1	0.576	0.193	0.787	1
594	594	X04606	real	BA44	lex	hus	target	1	0.543	0.191	0.794	1
595	595	X04606	real	BA44	lex	terning	target	1	0.577	0.202	0.733	1
596	596	X04606	real	BA44	lex	terning	filler	1	0.599	0.193	0.899	1
597	597	X04606	real	BA44	lex	skaal	target	1	0.711	0.228	0.671	1
598	598	X04606	real	BA44	lex	glas	target	1	0.593	0.214	0.706	1
599	599	X04606	real	BA44	lex	plus	target	1	0.568	0.185	0.787	1
600	600	X04606	real	BA44	lex	vindue	target	1	0.541	0.193	0.791	1
601	601	X04606	real	BA44	gram	hat	filler	1	0.691	0.174	0.853	1
602	602	X04606	real	BA44	gram	skaal	filler	1	0.673	0.195	0.817	1
603	603	X04606	real	BA44	gram	baelte	filler	1	0.757	0.174	0.752	1
604	604	X04606	real	BA44	gram	vindue	filler	1	0.769	0.177	1.115	1
605	605	X04606	real	BA44	gram	bold	filler	1	0.665	0.198	0.79	1
606	606	X04606	real	BA44	gram	pil	filler	1	0.864	0.16	0.95	1
607	607	X04606	real	BA44	gram	hjerte	filler	1	0.688	0.179	0.779	1
608	608	X04606	real	BA44	gram	minus	filler	1	0.921	0.179	0.886	1
609	609	X04606	real	BA44	gram	pil	target	1	0.626	0.123	0.698	1
610	610	X04606	real	BA44	gram	bold	target	1	0.65	0.172	0.641	1
611	611	X04606	real	BA44	gram	hat	target	1	0.573	0.126	0.66	1
612	612	X04606	real	BA44	gram	skaal	target	1	0.661	0.147	0.691	1
613	613	X04606	real	BA44	gram	pil	target	1	0.654	0.149	0.634	1
614	614	X04606	real	BA44	gram	hat	target	1	0.581	0.118	0.668	1
615	615	X04606	real	BA44	gram	bold	target	1	0.684	0.104	0.691	1
616	616	X04606	real	BA44	gram	skaal	target	1	0.619	0.122	0.657	1
617	617	X04606	real	BA44	gram	cirkel	target	1	0.618	0.1	0.972	1
618	618	X04606	real	BA44	gram	firkant	target	1	0.541	0.1	1.084	1
619	619	X04606	real	BA44	gram	trekant	target	1	0.748	0.0652	1.105	1
620	620	X04606	real	BA44	gram	firkant	target	1	0.677	0.115	0.954	1
621	621	X04606	real	BA44	gram	terning	target	1	0.625	0.18	0.857	1
622	622	X04606	real	BA44	gram	cirkel	target	1	0.688	0.095	0.874	1
623	623	X04606	real	BA44	gram	trekant	target	1	0.524	0.081	0.941	1
624	624	X04606	real	BA44	gram	terning	target	1	0.579	0.113	0.775	1
625	625	X04606	real	BA44	gram	hus	target	1	0.657	0.116	0.842	1
626	626	X04606	real	BA44	gram	plus	target	1	0.661	0.118	0.824	1
627	627	X04606	real	BA44	gram	brev	target	1	0.558	0.137	0.614	1
628	628	X04606	real	BA44	gram	glas	target	1	0.583	0.073	0.346	1
629	629	X04606	real	BA44	gram	plus	target	1	0.719	0.126	0.803	1
630	630	X04606	real	BA44	gram	glas	target	1	0.648	0.084	0.757	1
631	631	X04606	real	BA44	gram	hus	target	1	0.614	0.127	0.737	1
632	632	X04606	real	BA44	gram	brev	target	1	0.724	0.067	0.57	1
633	633	X04606	real	BA44	gram	hjerte	target	1	0.573	0.113	0.762	1
634	634	X04606	real	BA44	gram	minus	target	1	0.783	0.139	0.854	1
635	635	X04606	real	BA44	gram	baelte	target	1	0.546	0.054	0.828	1
636	636	X04606	real	BA44	gram	vindue	target	1	0.615	0.101	0.76	1
637	637	X04606	real	BA44	gram	minus	target	1	0.56	0.082	0.992	1
638	638	X04606	real	BA44	gram	baelte	target	1	0.657	0.103	0.809	1
639	639	X04606	real	BA44	gram	hjerte	target	1	0.626	0.143	0.679	1
640	640	X04606	real	BA44	gram	vindue	target	1	0.626	0.104	0.779	1
641	641	X84979	sham	BA44	lex	trekant	target	1	0.598	0.295	0.846	2
642	642	X84979	sham	BA44	lex	hus	target	1	0.627	0.325	0.737	2
643	643	X84979	sham	BA44	lex	glas	target	1	0.59	0.306	0.801	2
644	644	X84979	sham	BA44	lex	minus	filler	1	0.484	0.344	0.793	2
645	645	X84979	sham	BA44	lex	minus	target	1	0.635	0.195	0.798	2
646	646	X84979	sham	BA44	lex	trekant	target	1	0.677	0.223	0.778	2
647	647	X84979	sham	BA44	lex	glas	target	1	0.439	0.31	0.805	2
648	648	X84979	sham	BA44	lex	firkant	target	1	0.436	0.252	0.802	2
649	649	X84979	sham	BA44	lex	glas	filler	0	0.348	0.332	0.937	2
650	650	X84979	sham	BA44	lex	firkant	filler	1	0.447	0.325	0.884	2
651	651	X84979	sham	BA44	lex	bold	target	1	0.467	0.248	0.748	2
652	652	X84979	sham	BA44	lex	brev	target	1	0.432	0.317	0.657	2
653	653	X84979	sham	BA44	lex	cirkel	filler	1	0.477	0.4	0.846	2
654	654	X84979	sham	BA44	lex	plus	target	1	0.604	0.195	0.752	2
655	655	X84979	sham	BA44	lex	plus	filler	1	0.469	0.336	0.831	2
656	656	X84979	sham	BA44	lex	skaal	target	1	1.081	0.306	0.831	2
657	657	X84979	sham	BA44	lex	skaal	target	1	0.409	0.321	0.748	2
658	658	X84979	sham	BA44	lex	hus	target	1	0.511	0.257	0.82	2
659	659	X84979	sham	BA44	lex	minus	target	1	0.537	0.287	0.899	2
660	660	X84979	sham	BA44	lex	pil	target	1	0.528	0.317	0.733	2
661	661	X84979	sham	BA44	lex	vindue	target	1	0.579	0.249	0.661	2
662	662	X84979	sham	BA44	lex	terning	target	1	0.568	0.28	0.782	2
663	663	X84979	sham	BA44	lex	terning	target	1	0.471	0.275	0.748	2
664	664	X84979	sham	BA44	lex	bold	target	1	0.526	0.257	0.642	2
665	665	X84979	sham	BA44	lex	vindue	target	1	0.503	0.268	0.703	2
666	666	X84979	sham	BA44	lex	cirkel	target	1	0.581	0.351	0.71	2
667	667	X84979	sham	BA44	lex	baelte	target	1	0.462	0.268	0.771	2
668	668	X84979	sham	BA44	lex	brev	target	1	0.507	0.227	0.714	2
669	669	X84979	sham	BA44	lex	firkant	target	1	0.516	0.233	0.851	2
670	670	X84979	sham	BA44	lex	hjerte	target	1	0.492	0.261	0.672	2
671	671	X84979	sham	BA44	lex	hat	target	1	0.62	0.321	0.551	2
672	672	X84979	sham	BA44	lex	baelte	target	1	0.971	0.183	0.672	2
673	673	X84979	sham	BA44	lex	brev	filler	1	0.435	0.31	0.737	2
674	674	X84979	sham	BA44	lex	pil	target	1	0.473	0.223	0.68	2
675	675	X84979	sham	BA44	lex	terning	filler	1	0.451	0.397	0.71	2
676	676	X84979	sham	BA44	lex	bold	filler	1	0.511	0.298	0.737	2
677	677	X84979	sham	BA44	lex	hjerte	target	1	0.602	0.257	0.661	2
678	678	X84979	sham	BA44	lex	plus	target	1	0.535	0.237	0.748	2
679	679	X84979	sham	BA44	lex	hat	target	1	0.477	0.272	0.578	2
680	680	X84979	sham	BA44	lex	cirkel	target	1	0.658	0.287	0.812	2
681	681	X84979	sham	BA44	gram	vindue	filler	1	0.616	0.313	0.848	2
682	682	X84979	sham	BA44	gram	skaal	filler	1	0.443	0.291	0.861	2
683	683	X84979	sham	BA44	gram	firkant	target	1	0.579	0.2	1.024	2
684	684	X84979	sham	BA44	gram	hjerte	target	1	0.579	0.23	0.737	2
685	685	X84979	sham	BA44	gram	glas	target	1	0.469	0.257	0.993	2
686	686	X84979	sham	BA44	gram	pil	target	1	0.45	0.261	0.895	2
687	687	X84979	sham	BA44	gram	brev	target	1	0.677	0.23	0.944	2
688	688	X84979	sham	BA44	gram	minus	filler	1	0.715	0.321	1.035	2
689	689	X84979	sham	BA44	gram	hus	target	1	0.547	0.248	0.951	2
690	690	X84979	sham	BA44	gram	terning	target	1	0.566	0.267	1.023	2
691	691	X84979	sham	BA44	gram	pil	filler	1	0.555	0.317	1	2
692	692	X84979	sham	BA44	gram	hus	target	1	0.526	0.23	0.854	2
693	693	X84979	sham	BA44	gram	terning	target	1	0.549	0.2	0.91	2
694	694	X84979	sham	BA44	gram	bold	filler	1	0.541	0.351	0.831	2
695	695	X84979	sham	BA44	gram	skaal	target	1	0.522	0.283	0.846	2
696	696	X84979	sham	BA44	gram	cirkel	target	1	0.605	0.249	0.952	2
697	697	X84979	sham	BA44	gram	pil	target	1	0.545	0.253	0.842	2
698	698	X84979	sham	BA44	gram	baelte	target	1	0.775	0.253	0.88	2
699	699	X84979	sham	BA44	gram	baelte	filler	1	0.593	0.332	0.893	2
700	700	X84979	sham	BA44	gram	firkant	target	1	0.524	0.241	1.038	2
701	701	X84979	sham	BA44	gram	hjerte	target	1	0.543	0.256	0.901	2
702	702	X84979	sham	BA44	gram	bold	target	1	0.518	0.261	0.876	2
703	703	X84979	sham	BA44	gram	cirkel	target	1	0.56	0.268	0.99	2
704	704	X84979	sham	BA44	gram	baelte	target	1	0.605	0.23	0.963	2
705	705	X84979	sham	BA44	gram	bold	target	1	0.602	0.208	0.774	2
706	706	X84979	sham	BA44	gram	plus	target	1	0.534	0.283	0.922	2
707	707	X84979	sham	BA44	gram	hat	target	1	0.662	0.348	0.691	2
708	708	X84979	sham	BA44	gram	vindue	target	1	0.665	0.237	0.794	2
709	709	X84979	sham	BA44	gram	minus	target	0	0.547	0.58	1.038	2
710	710	X84979	sham	BA44	gram	trekant	target	0	0.467	0.317	1.161	2
711	711	X84979	sham	BA44	gram	hat	filler	1	0.516	0.336	0.802	2
712	712	X84979	sham	BA44	gram	minus	target	1	0.579	0.382	1.058	2
713	713	X84979	sham	BA44	gram	brev	target	1	0.496	0.223	0.774	2
714	714	X84979	sham	BA44	gram	trekant	target	1	0.537	0.276	0.986	2
715	715	X84979	sham	BA44	gram	hat	target	1	0.534	0.234	0.778	2
716	716	X84979	sham	BA44	gram	glas	target	1	0.443	0.28	0.993	2
717	717	X84979	sham	BA44	gram	vindue	target	1	0.59	0.332	0.929	2
718	718	X84979	sham	BA44	gram	skaal	target	1	0.524	0.241	1.035	2
719	719	X84979	sham	BA44	gram	plus	target	1	0.555	0.229	1.054	2
720	720	X84979	sham	BA44	gram	hjerte	filler	1	0.535	0.344	0.786	2
721	721	X84979	sham	BA47	lex	vindue	target	1	0.575	0.215	0.589	2
722	722	X84979	sham	BA47	lex	brev	target	1	0.466	0.268	0.687	2
723	723	X84979	sham	BA47	lex	baelte	target	1	0.382	0.246	0.703	2
724	724	X84979	sham	BA47	lex	skaal	target	1	0.49	0.305	0.573	2
725	725	X84979	sham	BA47	lex	trekant	target	1	0.613	0.268	0.895	2
726	726	X84979	sham	BA47	lex	firkant	target	1	0.654	0.287	0.891	2
727	727	X84979	sham	BA47	lex	trekant	target	1	0.398	0.306	0.812	2
728	728	X84979	sham	BA47	lex	hjerte	target	1	0.594	0.276	0.733	2
729	729	X84979	sham	BA47	lex	trekant	filler	1	0.73	0.325	0.827	2
730	730	X84979	sham	BA47	lex	vindue	target	1	0.647	0.272	0.71	2
731	731	X84979	sham	BA47	lex	cirkel	target	1	0.585	0.283	0.87	2
732	732	X84979	sham	BA47	lex	glas	target	1	0.379	0.31	0.88	2
733	733	X84979	sham	BA47	lex	terning	target	1	0.371	0.317	0.669	2
734	734	X84979	sham	BA47	lex	skaal	target	1	0.492	0.295	0.684	2
735	735	X84979	sham	BA47	lex	minus	target	1	0.583	0.272	0.895	2
736	736	X84979	sham	BA47	lex	hus	target	1	0.617	0.227	0.865	2
737	737	X84979	sham	BA47	lex	baelte	target	1	0.564	0.272	0.672	2
738	738	X84979	sham	BA47	lex	baelte	filler	1	0.515	0.389	0.706	2
739	739	X84979	sham	BA47	lex	plus	target	1	0.45	0.246	0.771	2
740	740	X84979	sham	BA47	lex	plus	target	1	0.482	0.267	0.886	2
741	741	X84979	sham	BA47	lex	brev	target	1	0.602	0.314	0.623	2
742	742	X84979	sham	BA47	lex	hat	filler	1	0.424	0.34	0.589	2
743	743	X84979	sham	BA47	lex	pil	target	1	0.522	0.257	0.823	2
744	744	X84979	sham	BA47	lex	pil	filler	1	0.492	0.314	0.755	2
745	745	X84979	sham	BA47	lex	terning	target	1	0.406	0.248	0.844	2
746	746	X84979	sham	BA47	lex	hat	target	1	0.401	0.264	0.514	2
747	747	X84979	sham	BA47	lex	hjerte	filler	1	0.513	0.378	0.687	2
748	748	X84979	sham	BA47	lex	glas	target	1	0.439	0.234	0.782	2
749	749	X84979	sham	BA47	lex	minus	target	1	0.31	0.233	0.912	2
750	750	X84979	sham	BA47	lex	cirkel	target	1	0.379	0.294	0.733	2
751	751	X84979	sham	BA47	lex	hus	target	1	0.425	0.248	0.821	2
752	752	X84979	sham	BA47	lex	skaal	filler	1	0.402	0.347	0.828	2
753	753	X84979	sham	BA47	lex	pil	target	1	0.753	0.298	0.729	2
754	754	X84979	sham	BA47	lex	hat	target	1	0.447	0.306	0.601	2
755	755	X84979	sham	BA47	lex	bold	target	1	0.477	0.287	0.699	2
756	756	X84979	sham	BA47	lex	bold	target	1	0.273	0.34	0.691	2
757	757	X84979	sham	BA47	lex	vindue	filler	1	0.405	0.31	0.835	2
758	758	X84979	sham	BA47	lex	firkant	target	1	0.654	0.253	0.842	2
759	759	X84979	sham	BA47	lex	hus	filler	1	0.511	0.404	0.789	2
760	760	X84979	sham	BA47	lex	hjerte	target	1	0.556	0.238	0.65	2
761	761	X84979	sham	BA47	gram	bold	target	1	0.481	0.227	0.778	2
762	762	X84979	sham	BA47	gram	brev	target	1	0.474	0.221	0.893	2
763	763	X84979	sham	BA47	gram	pil	target	1	0.451	0.218	0.855	2
764	764	X84979	sham	BA47	gram	firkant	target	1	0.326	0.185	1.031	2
765	765	X84979	sham	BA47	gram	hus	target	1	0.551	0.244	0.89	2
766	766	X84979	sham	BA47	gram	trekant	target	1	0.398	0.276	1.046	2
767	767	X84979	sham	BA47	gram	minus	target	0	0.482	0.271	1.84	2
768	768	X84979	sham	BA47	gram	terning	target	1	0.518	0.234	0.808	2
769	769	X84979	sham	BA47	gram	glas	target	0	0.424	1.073	2.444	2
770	770	X84979	sham	BA47	gram	hus	target	1	0.541	0.317	0.778	2
771	771	X84979	sham	BA47	gram	plus	target	1	0.571	0.159	0.884	2
772	772	X84979	sham	BA47	gram	vindue	target	1	0.398	0.238	0.744	2
773	773	X84979	sham	BA47	gram	firkant	target	1	0.497	0.286	1.016	2
774	774	X84979	sham	BA47	gram	skaal	target	1	0.473	0.287	1.012	2
775	775	X84979	sham	BA47	gram	cirkel	target	1	0.398	0.202	0.867	2
776	776	X84979	sham	BA47	gram	hat	target	1	0.42	0.298	0.774	2
777	777	X84979	sham	BA47	gram	plus	target	1	0.518	0.291	1.043	2
778	778	X84979	sham	BA47	gram	brev	filler	1	0.632	0.374	0.797	2
779	779	X84979	sham	BA47	gram	cirkel	filler	1	0.436	0.397	0.905	2
780	780	X84979	sham	BA47	gram	cirkel	target	1	0.598	0.306	0.997	2
781	781	X84979	sham	BA47	gram	trekant	target	1	0.556	0.261	1.058	2
782	782	X84979	sham	BA47	gram	hat	target	1	0.367	0.208	0.657	2
783	783	X84979	sham	BA47	gram	terning	target	1	0.493	0.241	0.985	2
784	784	X84979	sham	BA47	gram	pil	target	1	0.511	0.196	0.805	2
785	785	X84979	sham	BA47	gram	minus	target	0	0.545	0.234	2.961	2
786	786	X84979	sham	BA47	gram	firkant	filler	1	0.501	0.286	0.97	2
787	787	X84979	sham	BA47	gram	hus	filler	1	0.5	0.374	0.842	2
788	788	X84979	sham	BA47	gram	hjerte	target	1	0.469	0.272	0.899	2
789	789	X84979	sham	BA47	gram	baelte	target	1	0.496	0.264	1.073	2
790	790	X84979	sham	BA47	gram	skaal	target	1	0.628	0.28	0.967	2
791	791	X84979	sham	BA47	gram	vindue	target	0	0.568	0.699	0.793	2
792	792	X84979	sham	BA47	gram	hjerte	target	1	0.516	0.305	0.863	2
793	793	X84979	sham	BA47	gram	glas	target	1	0.466	0.234	1.088	2
794	794	X84979	sham	BA47	gram	plus	filler	1	0.52	0.374	0.775	2
795	795	X84979	sham	BA47	gram	bold	target	1	0.477	0.264	0.763	2
796	796	X84979	sham	BA47	gram	glas	filler	1	0.503	0.359	0.846	2
797	797	X84979	sham	BA47	gram	trekant	filler	1	0.57	0.302	0.958	2
798	798	X84979	sham	BA47	gram	brev	target	1	0.604	0.229	0.825	2
799	799	X84979	sham	BA47	gram	baelte	target	1	0.571	0.2	0.823	2
800	800	X84979	sham	BA47	gram	terning	filler	0	0.382	0.899	1.046	2
801	801	X84979	real	BA47	lex	hus	target	1	0.851	0.257	0.748	1
802	802	X84979	real	BA47	lex	plus	filler	1	0.719	0.328	0.691	1
803	803	X84979	real	BA47	lex	firkant	filler	1	0.643	0.374	0.857	1
804	804	X84979	real	BA47	lex	baelte	target	1	0.76	0.234	0.661	1
805	805	X84979	real	BA47	lex	hjerte	target	1	0.628	0.298	0.653	1
806	806	X84979	real	BA47	lex	brev	target	1	0.654	0.204	0.51	1
807	807	X84979	real	BA47	lex	bold	target	1	0.76	0.219	0.548	1
808	808	X84979	real	BA47	lex	glas	filler	1	0.586	0.351	0.744	1
809	809	X84979	real	BA47	lex	skaal	target	1	0.636	0.306	0.687	1
810	810	X84979	real	BA47	lex	skaal	target	1	0.67	0.306	0.665	1
811	811	X84979	real	BA47	lex	glas	target	1	0.841	0.241	0.771	1
812	812	X84979	real	BA47	lex	glas	target	1	0.688	0.286	0.771	1
813	813	X84979	real	BA47	lex	pil	target	1	0.764	0.212	0.604	1
814	814	X84979	real	BA47	lex	firkant	target	1	0.696	0.298	0.775	1
815	815	X84979	real	BA47	lex	hus	target	1	0.662	0.302	0.68	1
816	816	X84979	real	BA47	lex	hat	target	1	0.583	0.291	0.544	1
817	817	X84979	real	BA47	lex	cirkel	target	1	0.711	0.249	0.737	1
818	818	X84979	real	BA47	lex	vindue	target	0	0.564	0.321	0.65	1
819	819	X84979	real	BA47	lex	hat	target	1	0.651	0.261	0.548	1
820	820	X84979	real	BA47	lex	pil	target	1	0.764	0.306	0.551	1
821	821	X84979	real	BA47	lex	cirkel	filler	1	0.511	0.419	0.801	1
822	822	X84979	real	BA47	lex	firkant	target	1	0.677	0.264	0.831	1
823	823	X84979	real	BA47	lex	minus	target	1	0.832	0.219	0.88	1
824	824	X84979	real	BA47	lex	cirkel	target	1	0.688	0.279	0.718	1
825	825	X84979	real	BA47	lex	minus	filler	1	0.775	0.325	0.755	1
826	826	X84979	real	BA47	lex	plus	target	0	0.654	0.21	0.794	1
827	827	X84979	real	BA47	lex	terning	filler	1	0.568	0.332	0.733	1
828	828	X84979	real	BA47	lex	vindue	target	1	0.636	0.253	0.642	1
829	829	X84979	real	BA47	lex	trekant	target	1	1.093	0.276	0.74	1
830	830	X84979	real	BA47	lex	brev	filler	1	0.448	0.309	0.622	1
831	831	X84979	real	BA47	lex	plus	target	1	0.726	0.272	0.729	1
832	832	X84979	real	BA47	lex	terning	target	0	0.673	0.473	0.752	1
833	833	X84979	real	BA47	lex	bold	target	1	0.566	0.29	0.596	1
834	834	X84979	real	BA47	lex	trekant	target	1	0.719	0.241	0.722	1
835	835	X84979	real	BA47	lex	minus	target	1	0.907	0.147	0.729	1
836	836	X84979	real	BA47	lex	hjerte	target	1	0.877	0.264	0.612	1
837	837	X84979	real	BA47	lex	brev	target	1	0.56	0.261	0.593	1
838	838	X84979	real	BA47	lex	bold	filler	1	0.518	0.287	0.676	1
839	839	X84979	real	BA47	lex	baelte	target	1	0.613	0.238	0.691	1
840	840	X84979	real	BA47	lex	terning	target	1	0.574	0.263	0.699	1
841	841	X84979	real	BA47	gram	baelte	filler	1	0.749	0.328	0.66	1
842	842	X84979	real	BA47	gram	glas	target	1	0.7	0.252	0.744	1
843	843	X84979	real	BA47	gram	pil	target	1	0.608	0.309	0.764	1
844	844	X84979	real	BA47	gram	bold	target	0	0.856	0.393	0.66	1
845	845	X84979	real	BA47	gram	baelte	target	1	0.93	0.234	0.718	1
846	846	X84979	real	BA47	gram	hus	target	1	0.515	0.151	0.767	1
847	847	X84979	real	BA47	gram	trekant	target	1	0.661	0.221	0.878	1
848	848	X84979	real	BA47	gram	hjerte	filler	1	0.636	0.355	0.706	1
849	849	X84979	real	BA47	gram	minus	target	1	0.568	0.268	0.907	1
850	850	X84979	real	BA47	gram	minus	filler	1	0.56	0.306	0.899	1
851	851	X84979	real	BA47	gram	firkant	target	1	0.692	0.378	0.763	1
852	852	X84979	real	BA47	gram	cirkel	target	1	0.574	0.263	0.867	1
853	853	X84979	real	BA47	gram	plus	target	1	0.753	0.248	0.897	1
854	854	X84979	real	BA47	gram	hjerte	target	1	0.59	0.223	0.737	1
855	855	X84979	real	BA47	gram	terning	target	1	0.511	0.174	0.763	1
856	856	X84979	real	BA47	gram	hat	filler	1	0.62	0.393	0.627	1
857	857	X84979	real	BA47	gram	bold	target	1	0.543	0.317	0.649	1
858	858	X84979	real	BA47	gram	hat	target	1	0.568	0.295	0.646	1
859	859	X84979	real	BA47	gram	plus	filler	1	0.658	0.257	1.088	1
860	860	X84979	real	BA47	gram	firkant	target	1	0.809	0.272	0.956	1
861	861	X84979	real	BA47	gram	cirkel	target	1	0.534	0.283	1.092	1
862	862	X84979	real	BA47	gram	hus	target	1	0.745	0.317	0.869	1
863	863	X84979	real	BA47	gram	brev	target	1	0.654	0.196	0.699	1
864	864	X84979	real	BA47	gram	vindue	target	1	0.658	0.242	0.952	1
865	865	X84979	real	BA47	gram	minus	target	1	0.575	0.257	1.043	1
866	866	X84979	real	BA47	gram	skaal	filler	1	0.435	0.37	0.903	1
867	867	X84979	real	BA47	gram	skaal	target	1	0.594	0.234	0.691	1
868	868	X84979	real	BA47	gram	skaal	target	1	0.639	0.252	0.676	1
869	869	X84979	real	BA47	gram	pil	target	1	0.734	0.276	0.846	1
870	870	X84979	real	BA47	gram	brev	target	1	0.765	0.225	0.783	1
871	871	X84979	real	BA47	gram	vindue	target	1	0.654	0.196	0.733	1
872	872	X84979	real	BA47	gram	glas	target	1	0.775	0.31	0.948	1
873	873	X84979	real	BA47	gram	vindue	filler	1	0.681	0.329	0.922	1
874	874	X84979	real	BA47	gram	bold	filler	0	0.609	0.774	0.993	1
875	875	X84979	real	BA47	gram	terning	target	1	0.624	0.283	0.85	1
876	876	X84979	real	BA47	gram	baelte	target	1	0.76	0.276	0.839	1
877	877	X84979	real	BA47	gram	pil	target	1	0.715	0.272	0.82	1
878	878	X84979	real	BA47	gram	hjerte	target	1	0.768	0.309	0.84	1
879	879	X84979	real	BA47	gram	trekant	target	1	0.605	0.28	0.963	1
880	880	X84979	real	BA47	gram	hat	target	1	0.558	0.302	0.71	1
881	881	X84979	real	BA44	lex	glas	target	1	1.047	0.166	0.669	1
882	882	X84979	real	BA44	lex	cirkel	target	1	0.623	0.244	0.618	1
883	883	X84979	real	BA44	lex	bold	target	1	0.7	0.279	0.634	1
884	884	X84979	real	BA44	lex	hjerte	target	1	0.765	0.233	0.538	1
885	885	X84979	real	BA44	lex	terning	target	1	0.62	0.28	0.672	1
886	886	X84979	real	BA44	lex	hjerte	filler	1	0.654	0.302	0.634	1
887	887	X84979	real	BA44	lex	pil	target	1	0.665	0.237	0.626	1
888	888	X84979	real	BA44	lex	hus	target	1	0.605	0.212	0.771	1
889	889	X84979	real	BA44	lex	minus	target	1	0.669	0.241	0.878	1
890	890	X84979	real	BA44	lex	pil	filler	1	0.6	0.294	0.714	1
891	891	X84979	real	BA44	lex	baelte	filler	1	0.59	0.317	0.669	1
892	892	X84979	real	BA44	lex	pil	target	1	0.779	0.257	0.574	1
893	893	X84979	real	BA44	lex	skaal	target	1	0.715	0.23	0.684	1
894	894	X84979	real	BA44	lex	firkant	target	1	0.571	0.261	0.714	1
895	895	X84979	real	BA44	lex	trekant	target	1	0.658	0.268	0.907	1
896	896	X84979	real	BA44	lex	terning	target	1	0.73	0.238	0.725	1
897	897	X84979	real	BA44	lex	trekant	target	1	0.784	0.26	0.79	1
898	898	X84979	real	BA44	lex	skaal	target	1	0.635	0.267	0.691	1
899	899	X84979	real	BA44	lex	vindue	target	1	0.719	0.218	0.565	1
900	900	X84979	real	BA44	lex	vindue	target	1	0.67	0.246	0.627	1
901	901	X84979	real	BA44	lex	plus	target	0	0.639	0.225	2.077	1
902	902	X84979	real	BA44	lex	glas	target	1	0.665	0.202	0.722	1
903	903	X84979	real	BA44	lex	plus	target	0	0.583	0.219	1.133	1
904	904	X84979	real	BA44	lex	hus	target	1	0.707	0.196	0.665	1
905	905	X84979	real	BA44	lex	minus	target	1	0.787	0.246	0.831	1
906	906	X84979	real	BA44	lex	baelte	target	1	0.661	0.241	0.683	1
907	907	X84979	real	BA44	lex	hat	target	1	0.636	0.272	0.555	1
908	908	X84979	real	BA44	lex	trekant	filler	1	0.562	0.569	0.504	1
909	909	X84979	real	BA44	lex	hjerte	target	1	0.722	0.415	0.672	1
910	910	X84979	real	BA44	lex	brev	target	1	0.711	0.242	0.616	1
911	911	X84979	real	BA44	lex	hat	target	1	0.768	0.242	0.514	1
912	912	X84979	real	BA44	lex	baelte	target	0	0.624	0.623	0.574	1
913	913	X84979	real	BA44	lex	brev	target	1	0.647	0.253	0.642	1
914	914	X84979	real	BA44	lex	hus	filler	1	0.552	0.31	0.733	1
915	915	X84979	real	BA44	lex	vindue	filler	1	0.639	0.302	0.798	1
916	916	X84979	real	BA44	lex	hat	filler	1	0.574	0.325	0.512	1
917	917	X84979	real	BA44	lex	firkant	target	1	0.604	0.309	0.771	1
918	918	X84979	real	BA44	lex	bold	target	1	0.651	0.287	0.619	1
919	919	X84979	real	BA44	lex	skaal	filler	1	0.566	0.305	0.767	1
920	920	X84979	real	BA44	lex	cirkel	target	1	0.511	0.261	0.665	1
921	921	X84979	real	BA44	gram	baelte	target	1	0.745	0.193	0.601	1
922	922	X84979	real	BA44	gram	minus	target	1	0.688	0.178	0.925	1
923	923	X84979	real	BA44	gram	plus	filler	1	0.558	0.29	0.809	1
924	924	X84979	real	BA44	gram	hus	target	1	0.651	0.193	0.725	1
925	925	X84979	real	BA44	gram	vindue	target	1	0.692	0.237	0.634	1
926	926	X84979	real	BA44	gram	trekant	target	0	0.598	0.899	1.027	1
927	927	X84979	real	BA44	gram	plus	target	0	0.673	0.14	1.258	1
928	928	X84979	real	BA44	gram	glas	target	1	0.609	0.185	0.854	1
929	929	X84979	real	BA44	gram	glas	filler	1	0.749	0.325	0.759	1
930	930	X84979	real	BA44	gram	brev	target	1	0.594	0.257	0.631	1
931	931	X84979	real	BA44	gram	brev	filler	1	0.616	0.317	0.737	1
932	932	X84979	real	BA44	gram	cirkel	filler	1	0.719	0.329	0.842	1
933	933	X84979	real	BA44	gram	hat	target	1	0.617	0.185	0.593	1
934	934	X84979	real	BA44	gram	baelte	target	1	0.703	0.183	0.729	1
935	935	X84979	real	BA44	gram	pil	target	1	0.994	0.141	0.58	1
936	936	X84979	real	BA44	gram	firkant	filler	1	0.685	0.344	0.922	1
937	937	X84979	real	BA44	gram	trekant	target	1	0.726	0.223	0.993	1
938	938	X84979	real	BA44	gram	hus	filler	1	0.586	0.37	0.805	1
939	939	X84979	real	BA44	gram	trekant	filler	1	0.651	0.351	1.08	1
940	940	X84979	real	BA44	gram	firkant	target	1	0.651	0.223	1.058	1
941	941	X84979	real	BA44	gram	cirkel	target	1	0.609	0.185	0.801	1
942	942	X84979	real	BA44	gram	hjerte	target	1	0.685	0.242	0.842	1
943	943	X84979	real	BA44	gram	glas	target	1	0.564	0.223	0.748	1
944	944	X84979	real	BA44	gram	terning	target	1	0.639	0.238	0.925	1
945	945	X84979	real	BA44	gram	terning	target	1	0.632	0.276	0.876	1
946	946	X84979	real	BA44	gram	minus	target	1	0.579	0.23	0.941	1
947	947	X84979	real	BA44	gram	cirkel	target	1	0.898	0.283	0.771	1
948	948	X84979	real	BA44	gram	bold	target	1	0.658	0.257	0.691	1
949	949	X84979	real	BA44	gram	hjerte	target	0	0.643	0.268	0.941	1
950	950	X84979	real	BA44	gram	plus	target	1	0.613	0.249	0.967	1
951	951	X84979	real	BA44	gram	skaal	target	1	0.539	0.275	0.924	1
952	952	X84979	real	BA44	gram	skaal	target	0	0.589	0.481	0.611	1
953	953	X84979	real	BA44	gram	pil	target	1	0.666	0.246	0.665	1
954	954	X84979	real	BA44	gram	terning	filler	1	0.639	0.332	0.816	1
955	955	X84979	real	BA44	gram	brev	target	1	0.581	0.241	0.809	1
956	956	X84979	real	BA44	gram	hus	target	1	0.704	0.264	0.82	1
957	957	X84979	real	BA44	gram	bold	target	1	0.887	0.267	0.737	1
958	958	X84979	real	BA44	gram	vindue	target	1	0.613	0.234	0.786	1
959	959	X84979	real	BA44	gram	firkant	target	0	1.142	0.665	0.737	1
960	960	X84979	real	BA44	gram	hat	target	1	0.711	0.242	0.631	1
961	961	X71429	real	BA44	lex	baelte	target	1	0.809	0.189	0.608	1
962	962	X71429	real	BA44	lex	hat	target	1	0.787	0.283	0.569	1
963	963	X71429	real	BA44	lex	plus	target	1	0.904	0.287	0.691	1
964	964	X71429	real	BA44	lex	firkant	filler	1	0.772	0.329	0.831	1
965	965	X71429	real	BA44	lex	baelte	target	1	0.779	0.31	0.608	1
966	966	X71429	real	BA44	lex	minus	target	1	0.829	0.313	0.664	1
967	967	X71429	real	BA44	lex	plus	target	0	0.953	0.329	0.857	1
968	968	X71429	real	BA44	lex	cirkel	target	0	1.123	0.449	0.699	1
969	969	X71429	real	BA44	lex	trekant	target	1	0.791	0.263	0.836	1
970	970	X71429	real	BA44	lex	terning	target	0	0.779	0.332	0.752	1
971	971	X71429	real	BA44	lex	brev	target	1	1.226	0.363	0.561	1
972	972	X71429	real	BA44	lex	plus	filler	1	0.837	0.962	2.211	1
973	973	X71429	real	BA44	lex	hus	target	1	0.904	0.344	0.623	1
974	974	X71429	real	BA44	lex	bold	target	1	1.221	0.332	0.616	1
975	975	X71429	real	BA44	lex	firkant	target	1	1.247	0.325	0.672	1
976	976	X71429	real	BA44	lex	pil	target	1	0.907	0.291	0.555	1
977	977	X71429	real	BA44	lex	hjerte	target	0	0.836	0.408	0.895	1
978	978	X71429	real	BA44	lex	hjerte	target	1	1.111	0.321	0.752	1
979	979	X71429	real	BA44	lex	skaal	target	0	0.938	0.631	0.597	1
980	980	X71429	real	BA44	lex	brev	filler	1	0.807	0.328	0.668	1
981	981	X71429	real	BA44	lex	hus	target	1	1.145	0.348	0.612	1
982	982	X71429	real	BA44	lex	bold	target	1	0.994	0.206	0.672	1
983	983	X71429	real	BA44	lex	pil	target	1	1.135	0.401	0.588	1
984	984	X71429	real	BA44	lex	terning	filler	1	0.894	1.214	1.902	1
985	985	X71429	real	BA44	lex	bold	filler	1	0.885	0.351	0.816	1
986	986	X71429	real	BA44	lex	minus	target	1	0.907	0.302	0.895	1
987	987	X71429	real	BA44	lex	terning	target	1	0.862	0.374	0.812	1
988	988	X71429	real	BA44	lex	glas	filler	1	0.997	0.454	0.867	1
989	989	X71429	real	BA44	lex	cirkel	filler	1	0.904	0.378	0.941	1
990	990	X71429	real	BA44	lex	minus	filler	1	1.145	0.291	1.009	1
991	991	X71429	real	BA44	lex	hat	target	1	0.889	0.295	0.631	1
992	992	X71429	real	BA44	lex	brev	target	1	1.02	0.355	0.66	1
993	993	X71429	real	BA44	lex	skaal	target	1	1.002	0.348	0.71	1
994	994	X71429	real	BA44	lex	vindue	target	1	1.059	0.321	0.695	1
995	995	X71429	real	BA44	lex	trekant	target	1	0.832	0.363	0.714	1
996	996	X71429	real	BA44	lex	firkant	target	1	0.833	0.309	0.718	1
997	997	X71429	real	BA44	lex	cirkel	target	1	0.887	0.336	0.813	1
998	998	X71429	real	BA44	lex	vindue	target	1	1.017	0.359	0.706	1
999	999	X71429	real	BA44	lex	glas	target	1	1.02	0.336	0.893	1
1000	1000	X71429	real	BA44	lex	glas	target	1	0.911	0.397	0.967	1
1001	1001	X71429	real	BA44	gram	trekant	target	1	0.96	0.17	0.786	1
1002	1002	X71429	real	BA44	gram	bold	target	1	0.923	0.144	0.623	1
1003	1003	X71429	real	BA44	gram	brev	target	1	1.312	0.166	0.642	1
1004	1004	X71429	real	BA44	gram	glas	target	1	0.959	0.221	0.966	1
1005	1005	X71429	real	BA44	gram	skaal	target	1	1.2	0.164	0.702	1
1006	1006	X71429	real	BA44	gram	vindue	target	1	0.983	0.227	0.903	1
1007	1007	X71429	real	BA44	gram	pil	filler	1	1.013	0.359	0.844	1
1008	1008	X71429	real	BA44	gram	minus	target	1	0.877	0.28	1.073	1
1009	1009	X71429	real	BA44	gram	terning	target	1	0.949	0.208	0.816	1
1010	1010	X71429	real	BA44	gram	pil	target	1	0.866	0.196	0.646	1
1011	1011	X71429	real	BA44	gram	cirkel	target	1	0.936	0.225	0.859	1
1012	1012	X71429	real	BA44	gram	hat	target	1	0.906	0.183	0.599	1
1013	1013	X71429	real	BA44	gram	hjerte	target	1	1.157	0.215	0.812	1
1014	1014	X71429	real	BA44	gram	baelte	target	1	1.295	0.149	0.794	1
1015	1015	X71429	real	BA44	gram	minus	filler	1	0.904	0.242	0.967	1
1016	1016	X71429	real	BA44	gram	baelte	target	1	0.921	0.317	0.775	1
1017	1017	X71429	real	BA44	gram	bold	target	1	1.108	0.2	0.642	1
1018	1018	X71429	real	BA44	gram	plus	target	1	1.013	0.256	0.874	1
1019	1019	X71429	real	BA44	gram	terning	target	1	0.998	0.2	0.748	1
1020	1020	X71429	real	BA44	gram	hus	target	1	0.998	0.189	0.718	1
1021	1021	X71429	real	BA44	gram	hus	target	1	1.13	0.128	0.82	1
1022	1022	X71429	real	BA44	gram	vindue	target	1	0.941	0.2	0.797	1
1023	1023	X71429	real	BA44	gram	minus	target	1	0.972	0.193	0.914	1
1024	1024	X71429	real	BA44	gram	glas	target	1	0.73	0.219	0.839	1
1025	1025	X71429	real	BA44	gram	hat	filler	0	1.043	1.005	0.555	1
1026	1026	X71429	real	BA44	gram	firkant	target	1	0.952	0.202	0.817	1
1027	1027	X71429	real	BA44	gram	skaal	filler	1	0.873	0.329	0.801	1
1028	1028	X71429	real	BA44	gram	pil	target	1	0.814	0.241	0.657	1
1029	1029	X71429	real	BA44	gram	hjerte	target	1	0.929	0.168	0.901	1
1030	1030	X71429	real	BA44	gram	hat	target	1	0.745	0.212	0.623	1
1031	1031	X71429	real	BA44	gram	firkant	target	1	1.077	0.174	0.793	1
1032	1032	X71429	real	BA44	gram	brev	target	0	0.983	0.125	0.623	1
1033	1033	X71429	real	BA44	gram	baelte	filler	1	1.043	0.321	0.782	1
1034	1034	X71429	real	BA44	gram	skaal	target	1	1.036	0.218	0.725	1
1035	1035	X71429	real	BA44	gram	cirkel	target	1	0.799	0.179	0.744	1
1036	1036	X71429	real	BA44	gram	bold	filler	1	1.039	0.317	0.775	1
1037	1037	X71429	real	BA44	gram	trekant	target	1	1.111	0.178	0.842	1
1038	1038	X71429	real	BA44	gram	hjerte	filler	1	0.806	0.34	0.857	1
1039	1039	X71429	real	BA44	gram	vindue	filler	1	0.841	0.325	0.882	1
1040	1040	X71429	real	BA44	gram	plus	target	1	0.923	0.193	0.816	1
1041	1041	X71429	real	BA47	lex	hjerte	target	0	0.96	0.314	NA	1
1042	1042	X71429	real	BA47	lex	vindue	filler	0	1.04	0.737	NA	1
1043	1043	X71429	real	BA47	lex	trekant	target	0	0.862	0.264	NA	1
1044	1044	X71429	real	BA47	lex	hus	target	1	0.93	0.17	NA	1
1045	1045	X71429	real	BA47	lex	baelte	filler	1	0.934	0.295	NA	1
1046	1046	X71429	real	BA47	lex	baelte	target	1	0.948	0.199	NA	1
1047	1047	X71429	real	BA47	lex	hjerte	target	1	0.926	0.363	NA	1
1048	1048	X71429	real	BA47	lex	glas	target	1	0.836	0.321	NA	1
1049	1049	X71429	real	BA47	lex	hat	filler	1	0.738	0.344	NA	1
1050	1050	X71429	real	BA47	lex	skaal	filler	1	0.957	0.298	NA	1
1051	1051	X71429	real	BA47	lex	hat	target	1	0.862	0.283	NA	1
1052	1052	X71429	real	BA47	lex	terning	target	1	0.849	0.279	NA	1
1053	1053	X71429	real	BA47	lex	firkant	target	1	0.779	0.382	NA	1
1054	1054	X71429	real	BA47	lex	baelte	target	1	0.802	0.283	NA	1
1055	1055	X71429	real	BA47	lex	cirkel	target	1	0.821	0.242	NA	1
1056	1056	X71429	real	BA47	lex	trekant	target	1	0.907	0.344	NA	1
1057	1057	X71429	real	BA47	lex	plus	target	1	0.798	0.34	NA	1
1058	1058	X71429	real	BA47	lex	pil	target	1	0.967	0.347	NA	1
1059	1059	X71429	real	BA47	lex	hjerte	filler	1	0.696	0.366	NA	1
1060	1060	X71429	real	BA47	lex	vindue	target	1	0.858	0.317	NA	1
1061	1061	X71429	real	BA47	lex	hat	target	1	0.936	0.367	NA	1
1062	1062	X71429	real	BA47	lex	pil	target	1	1.002	0.351	NA	1
1063	1063	X71429	real	BA47	lex	plus	target	1	0.681	0.37	NA	1
1064	1064	X71429	real	BA47	lex	vindue	target	1	1.727	0.23	NA	1
1065	1065	X71429	real	BA47	lex	brev	target	1	1.293	0.363	NA	1
1066	1066	X71429	real	BA47	lex	skaal	target	0	1.417	0.48	NA	1
1067	1067	X71429	real	BA47	lex	minus	target	1	1.572	0.295	NA	1
1068	1068	X71429	real	BA47	lex	trekant	filler	1	1.455	0.314	NA	1
1069	1069	X71429	real	BA47	lex	bold	target	1	0.824	0.31	NA	1
1070	1070	X71429	real	BA47	lex	skaal	target	1	1.04	0.329	NA	1
1071	1071	X71429	real	BA47	lex	brev	target	1	0.765	0.393	NA	1
1072	1072	X71429	real	BA47	lex	pil	filler	1	0.938	0.31	NA	1
1073	1073	X71429	real	BA47	lex	minus	target	1	1.482	0.314	NA	1
1074	1074	X71429	real	BA47	lex	terning	target	1	0.843	0.385	NA	1
1075	1075	X71429	real	BA47	lex	hus	filler	1	0.749	0.314	NA	1
1076	1076	X71429	real	BA47	lex	bold	target	1	0.688	0.408	NA	1
1077	1077	X71429	real	BA47	lex	hus	target	1	0.833	0.328	NA	1
1078	1078	X71429	real	BA47	lex	cirkel	target	1	0.806	0.276	NA	1
1079	1079	X71429	real	BA47	lex	firkant	target	1	0.7	0.351	NA	1
1080	1080	X71429	real	BA47	lex	glas	target	1	0.925	0.229	NA	1
1081	1081	X71429	real	BA47	gram	skaal	target	1	0.813	0.238	0.608	1
1082	1082	X71429	real	BA47	gram	baelte	target	1	0.971	0.179	0.63	1
1083	1083	X71429	real	BA47	gram	firkant	filler	1	1.07	1.229	1.711	1
1084	1084	X71429	real	BA47	gram	firkant	target	1	0.913	0.214	0.676	1
1085	1085	X71429	real	BA47	gram	glas	filler	1	0.967	0.286	0.68	1
1086	1086	X71429	real	BA47	gram	glas	target	1	0.837	0.13	0.676	1
1087	1087	X71429	real	BA47	gram	brev	filler	0	0.934	0.276	1.077	1
1088	1088	X71429	real	BA47	gram	vindue	target	1	1.017	0.2	0.661	1
1089	1089	X71429	real	BA47	gram	baelte	target	1	0.93	0.215	0.74	1
1090	1090	X71429	real	BA47	gram	bold	target	1	0.802	0.196	0.672	1
1091	1091	X71429	real	BA47	gram	cirkel	target	1	0.877	0.189	0.672	1
1092	1092	X71429	real	BA47	gram	terning	target	1	0.858	0.219	0.684	1
1093	1093	X71429	real	BA47	gram	plus	target	1	1.211	0.21	0.748	1
1094	1094	X71429	real	BA47	gram	plus	target	1	0.795	0.141	0.767	1
1095	1095	X71429	real	BA47	gram	plus	target	1	0.873	0.17	0.789	1
1096	1096	X71429	real	BA47	gram	trekant	filler	0	0.948	0.29	1.065	1
1097	1097	X71429	real	BA47	gram	brev	target	1	0.837	0.225	0.557	1
1098	1098	X71429	real	BA47	gram	hjerte	target	1	0.856	0.26	0.76	1
1099	1099	X71429	real	BA47	gram	minus	target	1	0.772	0.159	0.744	1
1100	1100	X71429	real	BA47	gram	trekant	target	1	1.444	0.2	0.737	1
1101	1101	X71429	real	BA47	gram	bold	target	1	0.913	0.218	0.607	1
1102	1102	X71429	real	BA47	gram	trekant	filler	1	0.738	0.286	0.794	1
1103	1103	X71429	real	BA47	gram	hat	target	1	0.824	0.166	0.495	1
1104	1104	X71429	real	BA47	gram	firkant	filler	1	0.776	0.233	0.691	1
1105	1105	X71429	real	BA47	gram	trekant	target	1	0.753	0.23	0.669	1
1106	1106	X71429	real	BA47	gram	vindue	target	1	0.858	0.208	0.638	1
1107	1107	X71429	real	BA47	gram	firkant	target	1	0.975	0.121	0.771	1
1108	1108	X71429	real	BA47	gram	skaal	target	1	0.768	0.208	0.638	1
1109	1109	X71429	real	BA47	gram	pil	target	1	0.948	0.172	0.493	1
1110	1110	X71429	real	BA47	gram	hus	target	0	0.798	0.181	0.653	1
1111	1111	X71429	real	BA47	gram	hat	target	1	0.817	0.196	0.57	1
1112	1112	X71429	real	BA47	gram	pil	target	1	0.772	0.218	0.592	1
1113	1113	X71429	real	BA47	gram	terning	target	1	0.832	0.227	0.748	1
1114	1114	X71429	real	BA47	gram	cirkel	target	1	0.881	0.212	0.699	1
1115	1115	X71429	real	BA47	gram	hjerte	target	0	0.839	0.196	0.744	1
1116	1116	X71429	real	BA47	gram	plus	filler	1	0.839	0.34	0.823	1
1117	1117	X71429	real	BA47	gram	plus	target	1	0.915	0.253	0.744	1
1118	1118	X71429	real	BA47	gram	brev	target	1	0.87	0.196	0.737	1
1119	1119	X71429	real	BA47	gram	plus	filler	1	0.822	0.313	0.806	1
1120	1120	X71429	real	BA47	gram	minus	target	1	0.779	0.212	0.846	1
1121	1121	X71429	sham	BA44	lex	hat	target	1	0.824	0.246	0.574	2
1122	1122	X71429	sham	BA44	lex	brev	target	1	0.887	0.321	0.702	2
1123	1123	X71429	sham	BA44	lex	pil	filler	1	1.108	0.294	0.798	2
1124	1124	X71429	sham	BA44	lex	bold	target	1	0.817	0.276	0.665	2
1125	1125	X71429	sham	BA44	lex	firkant	target	1	0.741	0.302	0.831	2
1126	1126	X71429	sham	BA44	lex	skaal	target	1	1.032	0.253	0.665	2
1127	1127	X71429	sham	BA44	lex	hat	target	1	0.575	0.272	0.665	2
1128	1128	X71429	sham	BA44	lex	plus	target	1	0.784	0.279	0.752	2
1129	1129	X71429	sham	BA44	lex	plus	target	1	0.821	0.219	0.691	2
1130	1130	X71429	sham	BA44	lex	hus	target	1	0.873	0.268	0.827	2
1131	1131	X71429	sham	BA44	lex	cirkel	target	1	0.642	0.214	0.641	2
1132	1132	X71429	sham	BA44	lex	baelte	target	1	1.532	0.206	0.676	2
1133	1133	X71429	sham	BA44	lex	skaal	filler	1	0.933	0.218	0.794	2
1134	1134	X71429	sham	BA44	lex	trekant	filler	1	1.436	0.248	0.848	2
1135	1135	X71429	sham	BA44	lex	terning	target	1	0.56	0.264	0.755	2
1136	1136	X71429	sham	BA44	lex	hat	filler	0	1.119	0.234	0.986	2
1137	1137	X71429	sham	BA44	lex	glas	target	1	0.643	0.28	0.763	2
1138	1138	X71429	sham	BA44	lex	glas	target	1	0.836	0.28	0.808	2
1139	1139	X71429	sham	BA44	lex	baelte	target	1	0.658	0.31	0.767	2
1140	1140	X71429	sham	BA44	lex	bold	target	1	0.858	0.283	0.608	2
1141	1141	X71429	sham	BA44	lex	vindue	target	1	1.176	0.291	0.657	2
1142	1142	X71429	sham	BA44	lex	vindue	target	1	1.742	0.181	0.657	2
1143	1143	X71429	sham	BA44	lex	hus	target	1	0.783	0.208	0.616	2
1144	1144	X71429	sham	BA44	lex	firkant	target	1	0.817	0.261	0.805	2
1145	1145	X71429	sham	BA44	lex	terning	target	1	0.79	0.283	0.737	2
1146	1146	X71429	sham	BA44	lex	minus	target	1	0.803	0.325	0.87	2
1147	1147	X71429	sham	BA44	lex	minus	target	1	0.964	0.295	0.929	2
1148	1148	X71429	sham	BA44	lex	hjerte	target	1	0.413	0.336	0.752	2
1149	1149	X71429	sham	BA44	lex	vindue	filler	1	0.636	0.302	0.816	2
1150	1150	X71429	sham	BA44	lex	hjerte	filler	1	0.964	0.283	0.771	2
1151	1151	X71429	sham	BA44	lex	trekant	target	1	1.213	0.234	0.74	2
1152	1152	X71429	sham	BA44	lex	brev	target	1	0.883	0.248	0.58	2
1153	1153	X71429	sham	BA44	lex	hjerte	target	1	0.832	0.28	0.703	2
1154	1154	X71429	sham	BA44	lex	pil	target	1	0.849	0.252	0.714	2
1155	1155	X71429	sham	BA44	lex	trekant	target	1	0.991	0.23	0.748	2
1156	1156	X71429	sham	BA44	lex	baelte	filler	1	1.238	0.256	0.668	2
1157	1157	X71429	sham	BA44	lex	hus	filler	1	0.837	0.271	0.779	2
1158	1158	X71429	sham	BA44	lex	pil	target	1	0.7	0.257	0.646	2
1159	1159	X71429	sham	BA44	lex	skaal	target	1	0.73	0.249	0.601	2
1160	1160	X71429	sham	BA44	lex	cirkel	target	1	0.885	0.257	0.752	2
1161	1161	X71429	sham	BA44	gram	cirkel	target	1	0.818	0.126	0.71	2
1162	1162	X71429	sham	BA44	gram	firkant	target	1	0.934	0.166	0.797	2
1163	1163	X71429	sham	BA44	gram	plus	target	1	0.775	0.128	0.748	2
1164	1164	X71429	sham	BA44	gram	bold	target	1	0.821	0.102	0.653	2
1165	1165	X71429	sham	BA44	gram	minus	target	1	1.223	0.134	0.855	2
1166	1166	X71429	sham	BA44	gram	pil	target	1	0.711	0.106	0.612	2
1167	1167	X71429	sham	BA44	gram	brev	filler	1	0.911	0.253	0.725	2
1168	1168	X71429	sham	BA44	gram	terning	filler	1	1.215	0.294	0.828	2
1169	1169	X71429	sham	BA44	gram	trekant	target	1	1.265	0.172	0.828	2
1170	1170	X71429	sham	BA44	gram	skaal	target	1	0.849	0.168	0.687	2
1171	1171	X71429	sham	BA44	gram	plus	target	1	0.896	0.128	0.854	2
1172	1172	X71429	sham	BA44	gram	skaal	target	1	0.957	0.151	0.767	2
1173	1173	X71429	sham	BA44	gram	cirkel	target	1	1.032	0.132	0.71	2
1174	1174	X71429	sham	BA44	gram	firkant	filler	1	0.67	0.227	0.869	2
1175	1175	X71429	sham	BA44	gram	brev	target	1	1.226	0.134	0.596	2
1176	1176	X71429	sham	BA44	gram	trekant	target	1	0.738	0.128	0.786	2
1177	1177	X71429	sham	BA44	gram	hjerte	target	1	0.696	0.125	0.706	2
1178	1178	X71429	sham	BA44	gram	glas	target	1	0.824	0.147	0.85	2
1179	1179	X71429	sham	BA44	gram	hat	target	1	0.949	0.121	0.608	2
1180	1180	X71429	sham	BA44	gram	hjerte	target	1	0.787	0.134	0.722	2
1181	1181	X71429	sham	BA44	gram	vindue	target	1	0.868	0.145	0.653	2
1182	1182	X71429	sham	BA44	gram	hat	target	1	0.934	0.166	0.672	2
1183	1183	X71429	sham	BA44	gram	terning	target	1	1.074	0.155	0.752	2
1184	1184	X71429	sham	BA44	gram	brev	target	1	0.864	0.149	0.63	2
1185	1185	X71429	sham	BA44	gram	hus	target	1	0.967	0.153	0.741	2
1186	1186	X71429	sham	BA44	gram	glas	target	1	0.983	0.136	0.714	2
1187	1187	X71429	sham	BA44	gram	minus	target	1	1.097	0.13	0.825	2
1188	1188	X71429	sham	BA44	gram	baelte	target	1	0.636	0.147	0.737	2
1189	1189	X71429	sham	BA44	gram	cirkel	filler	1	1.1	0.264	0.733	2
1190	1190	X71429	sham	BA44	gram	hus	filler	1	0.738	0.276	0.737	2
1191	1191	X71429	sham	BA44	gram	baelte	target	1	0.822	0.122	0.676	2
1192	1192	X71429	sham	BA44	gram	firkant	target	1	0.841	0.172	0.798	2
1193	1193	X71429	sham	BA44	gram	hus	target	1	0.749	0.117	0.706	2
1194	1194	X71429	sham	BA44	gram	glas	filler	1	0.941	0.238	0.782	2
1195	1195	X71429	sham	BA44	gram	plus	filler	1	0.94	0.241	0.706	2
1196	1196	X71429	sham	BA44	gram	vindue	target	1	1.139	0.134	0.657	2
1197	1197	X71429	sham	BA44	gram	bold	target	1	0.933	0.16	0.63	2
1198	1198	X71429	sham	BA44	gram	terning	target	1	0.806	0.181	0.687	2
1199	1199	X71429	sham	BA44	gram	trekant	filler	1	0.666	0.276	0.827	2
1200	1200	X71429	sham	BA44	gram	pil	target	1	0.945	0.117	0.608	2
1201	1201	X71429	sham	BA47	lex	hat	target	1	0.975	0.229	0.592	2
1202	1202	X71429	sham	BA47	lex	plus	target	1	1.009	0.283	0.714	2
1203	1203	X71429	sham	BA47	lex	skaal	target	1	0.849	0.286	0.752	2
1204	1204	X71429	sham	BA47	lex	brev	target	1	1.055	0.291	0.653	2
1205	1205	X71429	sham	BA47	lex	skaal	target	1	1.217	0.325	0.669	2
1206	1206	X71429	sham	BA47	lex	hus	target	1	1.299	0.267	0.744	2
1207	1207	X71429	sham	BA47	lex	baelte	target	1	0.975	0.286	0.802	2
1208	1208	X71429	sham	BA47	lex	terning	filler	1	0.87	0.314	0.854	2
1209	1209	X71429	sham	BA47	lex	plus	target	1	0.99	0.187	0.733	2
1210	1210	X71429	sham	BA47	lex	vindue	target	1	0.753	0.291	0.691	2
1211	1211	X71429	sham	BA47	lex	plus	filler	1	1.236	0.253	0.737	2
1212	1212	X71429	sham	BA47	lex	pil	target	1	1.2	0.279	0.599	2
1213	1213	X71429	sham	BA47	lex	firkant	target	1	0.994	0.208	0.82	2
1214	1214	X71429	sham	BA47	lex	bold	target	1	0.868	0.241	0.634	2
1215	1215	X71429	sham	BA47	lex	glas	target	1	0.955	0.328	0.867	2
1216	1216	X71429	sham	BA47	lex	brev	target	1	1.198	0.234	0.597	2
1217	1217	X71429	sham	BA47	lex	firkant	filler	1	1.017	0.248	0.84	2
1218	1218	X71429	sham	BA47	lex	hat	target	1	0.849	0.275	0.596	2
1219	1219	X71429	sham	BA47	lex	hjerte	target	1	0.91	0.286	0.737	2
1220	1220	X71429	sham	BA47	lex	hjerte	target	1	0.885	0.283	0.778	2
1221	1221	X71429	sham	BA47	lex	brev	filler	0	0.843	0.763	0.74	2
1222	1222	X71429	sham	BA47	lex	minus	filler	1	1.006	0.257	0.816	2
1223	1223	X71429	sham	BA47	lex	firkant	target	1	0.704	0.276	0.903	2
1224	1224	X71429	sham	BA47	lex	pil	target	1	0.994	0.249	0.631	2
1225	1225	X71429	sham	BA47	lex	terning	target	1	0.783	0.283	0.74	2
1226	1226	X71429	sham	BA47	lex	trekant	target	1	0.775	0.295	0.793	2
1227	1227	X71429	sham	BA47	lex	bold	target	1	0.898	0.225	0.79	2
1228	1228	X71429	sham	BA47	lex	terning	target	0	0.952	0.244	1.256	2
1229	1229	X71429	sham	BA47	lex	trekant	target	1	0.809	0.363	0.797	2
1230	1230	X71429	sham	BA47	lex	cirkel	filler	1	1.062	0.256	0.779	2
1231	1231	X71429	sham	BA47	lex	glas	filler	1	0.632	0.287	0.937	2
1232	1232	X71429	sham	BA47	lex	minus	target	1	0.997	0.279	1.004	2
1233	1233	X71429	sham	BA47	lex	cirkel	target	1	1.493	0.306	0.786	2
1234	1234	X71429	sham	BA47	lex	vindue	target	1	0.949	0.298	0.789	2
1235	1235	X71429	sham	BA47	lex	bold	filler	1	0.696	0.404	0.869	2
1236	1236	X71429	sham	BA47	lex	hus	target	1	1.261	0.313	0.893	2
1237	1237	X71429	sham	BA47	lex	minus	target	1	0.975	0.313	0.974	2
1238	1238	X71429	sham	BA47	lex	baelte	target	1	0.917	0.263	0.691	2
1239	1239	X71429	sham	BA47	lex	cirkel	target	1	0.904	0.298	0.68	2
1240	1240	X71429	sham	BA47	lex	glas	target	1	0.907	0.302	0.763	2
1241	1241	X71429	sham	BA47	gram	bold	target	1	0.685	0.125	0.631	2
1242	1242	X71429	sham	BA47	gram	pil	target	1	0.873	0.178	0.646	2
1243	1243	X71429	sham	BA47	gram	terning	target	1	0.829	0.172	0.779	2
1244	1244	X71429	sham	BA47	gram	plus	target	1	0.795	0.179	0.92	2
1245	1245	X71429	sham	BA47	gram	glas	target	1	0.594	0.17	0.895	2
1246	1246	X71429	sham	BA47	gram	minus	target	1	0.753	0.166	0.941	2
1247	1247	X71429	sham	BA47	gram	hat	target	1	0.79	0.181	0.631	2
1248	1248	X71429	sham	BA47	gram	vindue	filler	1	0.959	0.241	0.851	2
1249	1249	X71429	sham	BA47	gram	baelte	target	1	1.104	0.14	0.733	2
1250	1250	X71429	sham	BA47	gram	hus	target	1	0.843	0.128	0.789	2
1251	1251	X71429	sham	BA47	gram	glas	target	1	0.784	0.141	0.878	2
1252	1252	X71429	sham	BA47	gram	minus	filler	1	0.87	0.249	0.782	2
1253	1253	X71429	sham	BA47	gram	cirkel	target	1	0.828	0.162	0.695	2
1254	1254	X71429	sham	BA47	gram	hjerte	target	1	0.898	0.153	0.821	2
1255	1255	X71429	sham	BA47	gram	trekant	target	1	0.802	0.166	0.793	2
1256	1256	X71429	sham	BA47	gram	trekant	target	1	1.206	0.14	0.767	2
1257	1257	X71429	sham	BA47	gram	vindue	target	1	0.809	0.136	0.593	2
1258	1258	X71429	sham	BA47	gram	plus	target	1	1.077	0.151	0.846	2
1259	1259	X71429	sham	BA47	gram	cirkel	target	1	0.817	0.159	0.801	2
1260	1260	X71429	sham	BA47	gram	skaal	target	1	1.005	0.126	0.722	2
1261	1261	X71429	sham	BA47	gram	firkant	target	1	1.154	0.176	0.943	2
1262	1262	X71429	sham	BA47	gram	minus	target	1	0.881	0.159	0.903	2
1263	1263	X71429	sham	BA47	gram	firkant	target	1	0.983	0.144	0.816	2
1264	1264	X71429	sham	BA47	gram	terning	target	1	0.938	0.14	0.748	2
1265	1265	X71429	sham	BA47	gram	brev	target	1	0.891	0.168	0.672	2
1266	1266	X71429	sham	BA47	gram	bold	filler	0	1.217	0.385	1.073	2
1267	1267	X71429	sham	BA47	gram	hus	target	1	1.081	0.151	0.653	2
1268	1268	X71429	sham	BA47	gram	baelte	target	1	0.836	0.189	0.793	2
1269	1269	X71429	sham	BA47	gram	brev	target	1	0.764	0.162	0.627	2
1270	1270	X71429	sham	BA47	gram	vindue	target	1	0.839	0.14	0.748	2
1271	1271	X71429	sham	BA47	gram	pil	filler	1	0.779	0.238	0.805	2
1272	1272	X71429	sham	BA47	gram	hjerte	target	1	0.919	0.144	0.782	2
1273	1273	X71429	sham	BA47	gram	bold	target	1	0.81	0.172	0.638	2
1274	1274	X71429	sham	BA47	gram	hat	filler	1	0.885	0.314	0.661	2
1275	1275	X71429	sham	BA47	gram	skaal	target	1	0.843	0.17	0.718	2
1276	1276	X71429	sham	BA47	gram	pil	target	1	0.809	0.178	0.748	2
1277	1277	X71429	sham	BA47	gram	hat	target	1	0.67	0.204	0.597	2
1278	1278	X71429	sham	BA47	gram	baelte	filler	1	1.006	0.276	0.623	2
1279	1279	X71429	sham	BA47	gram	skaal	filler	1	1.153	0.261	0.778	2
1280	1280	X71429	sham	BA47	gram	hjerte	filler	1	1.127	0.309	0.699	2
1281	1281	X44916	sham	BA44	gram	terning	filler	0	1.093	1.138	1.78	1
1282	1282	X44916	sham	BA44	gram	glas	target	1	1.127	0.134	0.687	1
1283	1283	X44916	sham	BA44	gram	plus	target	0	0.921	0.099	0.737	1
1284	1284	X44916	sham	BA44	gram	plus	filler	1	1.043	0.302	0.63	1
1285	1285	X44916	sham	BA44	gram	hjerte	target	1	1.001	0.157	0.607	1
1286	1286	X44916	sham	BA44	gram	pil	target	1	1.124	0.123	0.509	1
1287	1287	X44916	sham	BA44	gram	terning	target	1	0.986	0.141	0.607	1
1288	1288	X44916	sham	BA44	gram	trekant	filler	1	0.959	0.233	0.752	1
1289	1289	X44916	sham	BA44	gram	brev	target	1	0.799	0.149	0.561	1
1290	1290	X44916	sham	BA44	gram	baelte	target	1	0.806	0.134	0.592	1
1291	1291	X44916	sham	BA44	gram	glas	filler	1	0.772	0.252	0.805	1
1292	1292	X44916	sham	BA44	gram	brev	target	1	0.749	0.111	0.462	1
1293	1293	X44916	sham	BA44	gram	hat	target	1	0.688	0.092	0.485	1
1294	1294	X44916	sham	BA44	gram	plus	target	1	0.684	0.104	0.849	1
1295	1295	X44916	sham	BA44	gram	vindue	target	1	0.608	0.118	0.599	1
1296	1296	X44916	sham	BA44	gram	trekant	target	1	0.73	0.118	0.691	1
1297	1297	X44916	sham	BA44	gram	cirkel	target	1	0.657	0.135	0.633	1
1298	1298	X44916	sham	BA44	gram	glas	target	1	0.906	0.092	0.809	1
1299	1299	X44916	sham	BA44	gram	firkant	target	1	0.829	0.153	0.756	1
1300	1300	X44916	sham	BA44	gram	hus	target	1	0.896	0.104	0.818	1
1301	1301	X44916	sham	BA44	gram	terning	target	1	0.642	0.13	0.637	1
1302	1302	X44916	sham	BA44	gram	hus	filler	1	0.777	0.212	0.706	1
1303	1303	X44916	sham	BA44	gram	trekant	target	1	0.757	0.134	0.657	1
1304	1304	X44916	sham	BA44	gram	firkant	filler	1	0.871	0.214	0.725	1
1305	1305	X44916	sham	BA44	gram	hus	target	1	0.826	0.107	0.695	1
1306	1306	X44916	sham	BA44	gram	cirkel	target	1	0.78	0.13	0.553	1
1307	1307	X44916	sham	BA44	gram	cirkel	filler	1	0.6	0.179	0.649	1
1308	1308	X44916	sham	BA44	gram	hat	target	1	0.665	0.095	0.443	1
1309	1309	X44916	sham	BA44	gram	baelte	target	1	0.661	0.104	0.532	1
1310	1310	X44916	sham	BA44	gram	minus	target	1	0.703	0.085	0.772	1
1311	1311	X44916	sham	BA44	gram	bold	target	1	0.692	0.12	0.49	1
1312	1312	X44916	sham	BA44	gram	hjerte	target	1	0.57	0.13	0.599	1
1313	1313	X44916	sham	BA44	gram	vindue	target	1	0.611	0.112	0.529	1
1314	1314	X44916	sham	BA44	gram	pil	target	1	0.715	0.134	0.481	1
1315	1315	X44916	sham	BA44	gram	skaal	target	1	0.612	0.107	0.538	1
1316	1316	X44916	sham	BA44	gram	minus	target	1	0.668	0.135	0.783	1
1317	1317	X44916	sham	BA44	gram	bold	target	1	0.818	0.141	0.538	1
1318	1318	X44916	sham	BA44	gram	skaal	target	1	0.753	0.111	0.523	1
1319	1319	X44916	sham	BA44	gram	brev	filler	1	0.776	0.214	0.561	1
1320	1320	X44916	sham	BA44	gram	firkant	target	1	0.719	0.131	0.745	1
1321	1321	X44916	sham	BA44	lex	pil	filler	1	1.155	0.189	0.563	1
1322	1322	X44916	sham	BA44	lex	cirkel	target	1	0.966	0.193	0.667	1
1323	1323	X44916	sham	BA44	lex	terning	target	1	0.877	0.216	0.629	1
1324	1324	X44916	sham	BA44	lex	firkant	target	1	0.742	0.212	0.822	1
1325	1325	X44916	sham	BA44	lex	trekant	target	0	0.833	0.21	1.057	1
1326	1326	X44916	sham	BA44	lex	hat	filler	1	0.831	0.22	0.606	1
1327	1327	X44916	sham	BA44	lex	hat	target	1	1.169	0.214	0.393	1
1328	1328	X44916	sham	BA44	lex	pil	target	1	0.804	0.228	0.505	1
1329	1329	X44916	sham	BA44	lex	trekant	target	1	0.881	0.231	0.76	1
1330	1330	X44916	sham	BA44	lex	hjerte	target	1	1.001	0.183	0.584	1
1331	1331	X44916	sham	BA44	lex	minus	target	1	0.791	0.164	0.943	1
1332	1332	X44916	sham	BA44	lex	hus	target	1	1.043	0.214	0.821	1
1333	1333	X44916	sham	BA44	lex	cirkel	target	1	0.803	0.26	0.668	1
1334	1334	X44916	sham	BA44	lex	pil	target	1	0.757	0.235	0.513	1
1335	1335	X44916	sham	BA44	lex	bold	target	1	1.013	0.214	0.645	1
1336	1336	X44916	sham	BA44	lex	skaal	target	1	0.795	0.21	0.531	1
1337	1337	X44916	sham	BA44	lex	hat	target	1	0.804	0.185	0.444	1
1338	1338	X44916	sham	BA44	lex	baelte	target	1	0.837	0.149	0.805	1
1339	1339	X44916	sham	BA44	lex	skaal	filler	1	0.738	0.256	0.695	1
1340	1340	X44916	sham	BA44	lex	vindue	target	1	1.016	0.191	0.595	1
1341	1341	X44916	sham	BA44	lex	hus	filler	1	0.646	0.275	0.786	1
1342	1342	X44916	sham	BA44	lex	terning	target	1	0.985	0.197	0.544	1
1343	1343	X44916	sham	BA44	lex	plus	target	1	0.719	0.225	0.874	1
1344	1344	X44916	sham	BA44	lex	hjerte	target	1	0.773	0.228	0.741	1
1345	1345	X44916	sham	BA44	lex	hus	target	1	0.822	0.179	0.702	1
1346	1346	X44916	sham	BA44	lex	bold	target	1	0.726	0.256	0.603	1
1347	1347	X44916	sham	BA44	lex	trekant	filler	1	0.803	0.225	0.79	1
1348	1348	X44916	sham	BA44	lex	brev	target	1	0.772	0.191	0.886	1
1349	1349	X44916	sham	BA44	lex	vindue	filler	1	0.599	0.228	0.721	1
1350	1350	X44916	sham	BA44	lex	firkant	target	1	0.846	0.27	0.772	1
1351	1351	X44916	sham	BA44	lex	hjerte	filler	1	0.715	0.197	0.718	1
1352	1352	X44916	sham	BA44	lex	glas	target	1	0.887	0.275	0.84	1
1353	1353	X44916	sham	BA44	lex	brev	target	1	0.703	0.237	0.58	1
1354	1354	X44916	sham	BA44	lex	skaal	target	1	0.826	0.237	0.599	1
1355	1355	X44916	sham	BA44	lex	vindue	target	1	0.804	0.251	0.849	1
1356	1356	X44916	sham	BA44	lex	baelte	target	1	0.929	0.294	0.783	1
1357	1357	X44916	sham	BA44	lex	baelte	filler	1	0.676	0.278	0.517	1
1358	1358	X44916	sham	BA44	lex	minus	target	1	0.908	0.166	0.814	1
1359	1359	X44916	sham	BA44	lex	plus	target	1	0.688	0.279	1.122	1
1360	1360	X44916	sham	BA44	lex	glas	target	1	0.692	0.267	0.859	1
1361	1361	X44916	sham	BA47	gram	brev	target	1	1.652	0.189	0.59	1
1362	1362	X44916	sham	BA47	gram	hat	filler	1	1.807	0.208	0.517	1
1363	1363	X44916	sham	BA47	gram	cirkel	target	1	1.104	0.214	0.668	1
1364	1364	X44916	sham	BA47	gram	trekant	target	1	0.94	0.198	0.687	1
1365	1365	X44916	sham	BA47	gram	minus	target	1	0.973	0.181	0.895	1
1366	1366	X44916	sham	BA47	gram	minus	target	1	0.719	0.168	0.783	1
1367	1367	X44916	sham	BA47	gram	skaal	target	1	0.978	0.164	0.466	1
1368	1368	X44916	sham	BA47	gram	baelte	filler	1	1.066	0.255	0.509	1
1369	1369	X44916	sham	BA47	gram	hus	target	1	1.151	0.135	0.505	1
1370	1370	X44916	sham	BA47	gram	plus	target	1	0.677	0.145	0.641	1
1371	1371	X44916	sham	BA47	gram	bold	target	1	0.803	0.08	0.511	1
1372	1372	X44916	sham	BA47	gram	hjerte	target	1	1.108	0.206	0.561	1
1373	1373	X44916	sham	BA47	gram	glas	target	1	1.055	0.164	0.802	1
1374	1374	X44916	sham	BA47	gram	skaal	filler	1	0.936	0.195	0.649	1
1375	1375	X44916	sham	BA47	gram	terning	target	1	0.73	0.145	0.515	1
1376	1376	X44916	sham	BA47	gram	baelte	target	1	0.858	0.131	0.606	1
1377	1377	X44916	sham	BA47	gram	skaal	target	1	0.711	0.107	0.428	1
1378	1378	X44916	sham	BA47	gram	bold	target	1	0.585	0.164	0.454	1
1379	1379	X44916	sham	BA47	gram	hjerte	target	1	0.669	0.111	0.45	1
1380	1380	X44916	sham	BA47	gram	vindue	target	1	0.692	0.153	0.542	1
1381	1381	X44916	sham	BA47	gram	baelte	target	1	0.852	0.164	0.645	1
1382	1382	X44916	sham	BA47	gram	glas	target	1	0.796	0.181	1.096	1
1383	1383	X44916	sham	BA47	gram	hat	target	1	0.684	0.179	0.428	1
1384	1384	X44916	sham	BA47	gram	hjerte	filler	1	1.031	0.174	0.598	1
1385	1385	X44916	sham	BA47	gram	minus	filler	1	0.749	0.183	0.649	1
1386	1386	X44916	sham	BA47	gram	hat	target	1	1.013	0.16	0.443	1
1387	1387	X44916	sham	BA47	gram	firkant	target	1	0.791	0.16	0.668	1
1388	1388	X44916	sham	BA47	gram	pil	target	1	0.765	0.17	0.586	1
1389	1389	X44916	sham	BA47	gram	pil	filler	1	0.645	0.228	0.617	1
1390	1390	X44916	sham	BA47	gram	pil	target	1	0.703	0.187	0.492	1
1391	1391	X44916	sham	BA47	gram	bold	filler	1	1.181	0.221	0.55	1
1392	1392	X44916	sham	BA47	gram	terning	target	1	0.68	0.164	0.611	1
1393	1393	X44916	sham	BA47	gram	cirkel	target	1	0.692	0.177	0.521	1
1394	1394	X44916	sham	BA47	gram	brev	target	1	0.769	0.177	0.494	1
1395	1395	X44916	sham	BA47	gram	trekant	target	1	0.78	0.154	0.66	1
1396	1396	X44916	sham	BA47	gram	hus	target	1	0.861	0.104	0.737	1
1397	1397	X44916	sham	BA47	gram	plus	target	1	0.75	0.15	0.637	1
1398	1398	X44916	sham	BA47	gram	vindue	filler	1	0.631	0.202	0.561	1
1399	1399	X44916	sham	BA47	gram	vindue	target	1	0.642	0.095	0.485	1
1400	1400	X44916	sham	BA47	gram	firkant	target	1	0.566	0.172	0.683	1
1401	1401	X44916	sham	BA47	lex	terning	target	1	0.829	0.198	0.553	1
1402	1402	X44916	sham	BA47	lex	baelte	target	1	0.815	0.123	0.505	1
1403	1403	X44916	sham	BA47	lex	skaal	target	1	0.906	0.183	0.527	1
1404	1404	X44916	sham	BA47	lex	brev	target	1	0.822	0.179	0.511	1
1405	1405	X44916	sham	BA47	lex	minus	target	1	0.977	0.147	0.756	1
1406	1406	X44916	sham	BA47	lex	plus	target	1	0.841	0.145	0.729	1
1407	1407	X44916	sham	BA47	lex	hat	target	1	0.799	0.198	0.443	1
1408	1408	X44916	sham	BA47	lex	plus	filler	1	0.646	0.225	0.573	1
1409	1409	X44916	sham	BA47	lex	trekant	target	1	0.73	0.214	0.649	1
1410	1410	X44916	sham	BA47	lex	cirkel	filler	1	0.669	0.195	0.592	1
1411	1411	X44916	sham	BA47	lex	skaal	target	1	0.773	0.22	0.513	1
1412	1412	X44916	sham	BA47	lex	brev	target	1	0.86	0.176	0.447	1
1413	1413	X44916	sham	BA47	lex	minus	filler	1	0.7	0.183	0.611	1
1414	1414	X44916	sham	BA47	lex	bold	target	1	0.869	0.212	0.567	1
1415	1415	X44916	sham	BA47	lex	hat	target	1	0.977	0.208	0.363	1
1416	1416	X44916	sham	BA47	lex	pil	target	1	1.104	0.149	0.366	1
1417	1417	X44916	sham	BA47	lex	firkant	target	1	0.654	0.172	0.637	1
1418	1418	X44916	sham	BA47	lex	hus	target	1	0.581	0.118	0.721	1
1419	1419	X44916	sham	BA47	lex	trekant	target	1	0.919	0.166	0.59	1
1420	1420	X44916	sham	BA47	lex	terning	target	1	0.734	0.197	0.509	1
1421	1421	X44916	sham	BA47	lex	firkant	target	1	0.873	0.189	0.648	1
1422	1422	X44916	sham	BA47	lex	glas	target	1	0.635	0.122	0.76	1
1423	1423	X44916	sham	BA47	lex	pil	target	1	0.695	0.212	0.409	1
1424	1424	X44916	sham	BA47	lex	glas	target	1	1.608	0.183	0.683	1
1425	1425	X44916	sham	BA47	lex	cirkel	target	1	0.669	0.183	0.553	1
1426	1426	X44916	sham	BA47	lex	vindue	target	1	0.631	0.187	0.531	1
1427	1427	X44916	sham	BA47	lex	hjerte	target	1	0.653	0.162	0.652	1
1428	1428	X44916	sham	BA47	lex	bold	target	1	0.749	0.218	0.504	1
1429	1429	X44916	sham	BA47	lex	vindue	target	1	0.804	0.158	0.583	1
1430	1430	X44916	sham	BA47	lex	baelte	target	1	0.654	0.149	0.511	1
1431	1431	X44916	sham	BA47	lex	hjerte	target	1	0.627	0.172	0.649	1
1432	1432	X44916	sham	BA47	lex	glas	filler	1	0.58	0.17	0.768	1
1433	1433	X44916	sham	BA47	lex	minus	target	1	1.242	0.134	0.744	1
1434	1434	X44916	sham	BA47	lex	plus	target	1	0.804	0.147	0.876	1
1435	1435	X44916	sham	BA47	lex	hus	target	1	0.723	0.127	0.637	1
1436	1436	X44916	sham	BA47	lex	cirkel	target	1	0.614	0.181	0.529	1
1437	1437	X44916	sham	BA47	lex	brev	filler	1	0.742	0.195	0.454	1
1438	1438	X44916	sham	BA47	lex	terning	filler	1	0.608	0.21	0.664	1
1439	1439	X44916	sham	BA47	lex	firkant	filler	1	0.574	0.202	0.695	1
1440	1440	X44916	sham	BA47	lex	bold	filler	1	0.658	0.187	0.527	1
1441	1441	X44916	real	BA44	gram	trekant	target	1	1.039	0.16	0.619	2
1442	1442	X44916	real	BA44	gram	baelte	target	1	0.773	0.102	0.495	2
1443	1443	X44916	real	BA44	gram	baelte	target	1	0.797	0.13	0.508	2
1444	1444	X44916	real	BA44	gram	hjerte	target	1	0.883	0.094	0.479	2
1445	1445	X44916	real	BA44	gram	trekant	target	1	0.667	0.101	0.558	2
1446	1446	X44916	real	BA44	gram	bold	target	1	0.815	0.13	0.479	2
1447	1447	X44916	real	BA44	gram	plus	target	1	0.865	0.122	0.674	2
1448	1448	X44916	real	BA44	gram	minus	filler	1	1.024	0.202	0.677	2
1449	1449	X44916	real	BA44	gram	skaal	target	1	0.769	0.171	0.564	2
1450	1450	X44916	real	BA44	gram	cirkel	target	1	0.718	0.13	0.641	2
1451	1451	X44916	real	BA44	gram	firkant	target	1	0.685	0.141	0.638	2
1452	1452	X44916	real	BA44	gram	vindue	filler	1	0.822	0.22	0.602	2
1453	1453	X44916	real	BA44	gram	pil	target	1	0.718	0.144	0.551	2
1454	1454	X44916	real	BA44	gram	brev	target	1	0.831	0.182	0.554	2
1455	1455	X44916	real	BA44	gram	brev	target	1	0.66	0.112	0.443	2
1456	1456	X44916	real	BA44	gram	minus	target	1	0.765	0.12	0.79	2
1457	1457	X44916	real	BA44	gram	minus	target	1	0.746	0.202	0.886	2
1458	1458	X44916	real	BA44	gram	bold	filler	1	0.707	0.24	0.634	2
1459	1459	X44916	real	BA44	gram	hus	target	1	0.746	0.13	0.62	2
1460	1460	X44916	real	BA44	gram	baelte	filler	1	1.211	0.267	0.562	2
1461	1461	X44916	real	BA44	gram	glas	target	1	0.948	0.13	0.728	2
1462	1462	X44916	real	BA44	gram	hus	target	1	0.761	0.155	0.67	2
1463	1463	X44916	real	BA44	gram	pil	filler	1	0.733	0.226	0.604	2
1464	1464	X44916	real	BA44	gram	hjerte	filler	1	0.732	0.22	0.627	2
1465	1465	X44916	real	BA44	gram	terning	target	1	0.722	0.168	0.561	2
1466	1466	X44916	real	BA44	gram	vindue	target	1	0.797	0.151	0.53	2
1467	1467	X44916	real	BA44	gram	terning	target	1	0.736	0.146	0.524	2
1468	1468	X44916	real	BA44	gram	pil	target	1	0.815	0.155	0.497	2
1469	1469	X44916	real	BA44	gram	glas	target	1	0.838	0.135	0.706	2
1470	1470	X44916	real	BA44	gram	hat	target	1	0.744	0.2	0.393	2
1471	1471	X44916	real	BA44	gram	hat	filler	1	0.758	0.182	0.43	2
1472	1472	X44916	real	BA44	gram	hat	target	1	0.587	0.113	0.411	2
1473	1473	X44916	real	BA44	gram	skaal	filler	1	0.667	0.215	0.634	2
1474	1474	X44916	real	BA44	gram	firkant	target	1	0.74	0.149	0.674	2
1475	1475	X44916	real	BA44	gram	hjerte	target	1	0.959	0.144	0.472	2
1476	1476	X44916	real	BA44	gram	bold	target	1	0.743	0.141	0.486	2
1477	1477	X44916	real	BA44	gram	plus	target	1	0.736	0.138	0.772	2
1478	1478	X44916	real	BA44	gram	vindue	target	1	0.696	0.119	0.476	2
1479	1479	X44916	real	BA44	gram	cirkel	target	1	0.66	0.144	0.558	2
1480	1480	X44916	real	BA44	gram	skaal	target	1	0.678	0.131	0.557	2
1481	1481	X44916	real	BA44	lex	baelte	filler	1	1.391	0.195	0.53	2
1482	1482	X44916	real	BA44	lex	terning	target	1	1.049	0.159	0.479	2
1483	1483	X44916	real	BA44	lex	hus	filler	1	0.744	0.248	0.666	2
1484	1484	X44916	real	BA44	lex	hjerte	filler	1	0.736	0.22	0.461	2
1485	1485	X44916	real	BA44	lex	glas	target	1	0.776	0.127	0.648	2
1486	1486	X44916	real	BA44	lex	hus	target	1	0.685	0.126	0.587	2
1487	1487	X44916	real	BA44	lex	brev	target	1	0.653	0.177	0.447	2
1488	1488	X44916	real	BA44	lex	cirkel	target	1	0.635	0.173	0.497	2
1489	1489	X44916	real	BA44	lex	hjerte	target	1	0.831	0.109	0.51	2
1490	1490	X44916	real	BA44	lex	skaal	target	1	0.642	0.178	0.441	2
1491	1491	X44916	real	BA44	lex	firkant	target	1	0.689	0.231	0.569	2
1492	1492	X44916	real	BA44	lex	vindue	filler	1	0.725	0.205	0.598	2
1493	1493	X44916	real	BA44	lex	hat	target	1	0.671	0.184	0.371	2
1494	1494	X44916	real	BA44	lex	bold	target	1	0.74	0.182	0.466	2
1495	1495	X44916	real	BA44	lex	hat	target	1	0.613	0.148	0.324	2
1496	1496	X44916	real	BA44	lex	plus	target	1	0.779	0.151	0.771	2
1497	1497	X44916	real	BA44	lex	trekant	target	1	1.157	0.18	0.591	2
1498	1498	X44916	real	BA44	lex	trekant	target	1	0.934	0.216	0.533	2
1499	1499	X44916	real	BA44	lex	pil	target	1	0.82	0.189	0.452	2
1500	1500	X44916	real	BA44	lex	minus	target	1	0.747	0.157	0.79	2
1501	1501	X44916	real	BA44	lex	baelte	target	1	0.664	0.141	0.501	2
1502	1502	X44916	real	BA44	lex	plus	target	1	0.617	0.126	0.76	2
1503	1503	X44916	real	BA44	lex	firkant	target	1	0.869	0.177	0.58	2
1504	1504	X44916	real	BA44	lex	trekant	filler	1	0.664	0.245	0.616	2
1505	1505	X44916	real	BA44	lex	hjerte	target	1	0.62	0.135	0.517	2
1506	1506	X44916	real	BA44	lex	vindue	target	1	0.628	0.144	0.533	2
1507	1507	X44916	real	BA44	lex	bold	target	1	0.736	0.193	0.353	2
1508	1508	X44916	real	BA44	lex	vindue	target	1	0.602	0.138	0.419	2
1509	1509	X44916	real	BA44	lex	terning	target	1	0.66	0.155	0.447	2
1510	1510	X44916	real	BA44	lex	brev	target	1	0.718	0.151	0.429	2
1511	1511	X44916	real	BA44	lex	skaal	target	1	0.815	0.151	0.494	2
1512	1512	X44916	real	BA44	lex	cirkel	target	1	0.7	0.142	0.564	2
1513	1513	X44916	real	BA44	lex	hus	target	1	0.948	0.119	0.649	2
1514	1514	X44916	real	BA44	lex	hat	filler	1	0.754	0.18	0.436	2
1515	1515	X44916	real	BA44	lex	baelte	target	1	0.795	0.138	0.539	2
1516	1516	X44916	real	BA44	lex	pil	target	1	0.617	0.148	0.422	2
1517	1517	X44916	real	BA44	lex	minus	target	1	1.265	0.151	0.71	2
1518	1518	X44916	real	BA44	lex	pil	filler	1	0.682	0.18	0.501	2
1519	1519	X44916	real	BA44	lex	skaal	filler	1	0.703	0.249	0.623	2
1520	1520	X44916	real	BA44	lex	glas	target	1	0.747	0.142	0.717	2
1521	1521	X44916	real	BA47	gram	terning	target	1	1.323	0.153	0.564	2
1522	1522	X44916	real	BA47	gram	hus	target	1	0.7	0.169	0.627	2
1523	1523	X44916	real	BA47	gram	brev	target	1	0.718	0.144	0.497	2
1524	1524	X44916	real	BA47	gram	baelte	target	1	0.754	0.112	0.476	2
1525	1525	X44916	real	BA47	gram	firkant	target	1	0.761	0.169	0.62	2
1526	1526	X44916	real	BA47	gram	bold	target	1	0.88	0.36	0.443	2
1527	1527	X44916	real	BA47	gram	minus	target	1	0.916	0.119	0.803	2
1528	1528	X44916	real	BA47	gram	baelte	target	1	1.204	0.104	0.494	2
1529	1529	X44916	real	BA47	gram	hat	target	1	0.642	0.13	0.36	2
1530	1530	X44916	real	BA47	gram	trekant	filler	1	0.837	0.195	0.634	2
1531	1531	X44916	real	BA47	gram	pil	target	1	0.822	0.094	0.429	2
1532	1532	X44916	real	BA47	gram	trekant	target	1	0.671	0.166	0.775	2
1533	1533	X44916	real	BA47	gram	plus	target	1	0.733	0.153	0.823	2
1534	1534	X44916	real	BA47	gram	cirkel	target	1	0.62	0.087	0.51	2
1535	1535	X44916	real	BA47	gram	glas	filler	1	0.638	0.234	0.847	2
1536	1536	X44916	real	BA47	gram	vindue	target	1	0.66	0.133	0.526	2
1537	1537	X44916	real	BA47	gram	cirkel	target	1	0.875	0.186	0.59	2
1538	1538	X44916	real	BA47	gram	brev	filler	1	0.94	0.186	0.619	2
1539	1539	X44916	real	BA47	gram	terning	target	1	0.653	0.112	0.551	2
1540	1540	X44916	real	BA47	gram	terning	filler	1	0.696	0.229	0.604	2
1541	1541	X44916	real	BA47	gram	bold	target	1	0.74	0.124	0.477	2
1542	1542	X44916	real	BA47	gram	skaal	target	1	0.693	0.146	0.532	2
1543	1543	X44916	real	BA47	gram	hus	target	1	0.62	0.115	0.63	2
1544	1544	X44916	real	BA47	gram	glas	target	1	0.649	0.12	0.699	2
1545	1545	X44916	real	BA47	gram	skaal	target	1	0.671	0.119	0.497	2
1546	1546	X44916	real	BA47	gram	plus	target	1	0.638	0.122	0.753	2
1547	1547	X44916	real	BA47	gram	minus	target	1	0.605	0.109	0.641	2
1548	1548	X44916	real	BA47	gram	firkant	target	1	0.631	0.101	0.598	2
1549	1549	X44916	real	BA47	gram	plus	filler	1	0.718	0.208	0.535	2
1550	1550	X44916	real	BA47	gram	trekant	target	1	0.901	0.108	0.602	2
1551	1551	X44916	real	BA47	gram	hat	target	1	0.707	0.09	0.411	2
1552	1552	X44916	real	BA47	gram	cirkel	filler	1	0.631	0.215	0.543	2
1553	1553	X44916	real	BA47	gram	vindue	target	1	0.605	0.142	0.473	2
1554	1554	X44916	real	BA47	gram	firkant	filler	1	0.588	0.187	0.623	2
1555	1555	X44916	real	BA47	gram	hjerte	target	1	0.631	0.142	0.495	2
1556	1556	X44916	real	BA47	gram	hus	filler	1	0.592	0.184	0.566	2
1557	1557	X44916	real	BA47	gram	brev	target	1	0.71	0.119	0.454	2
1558	1558	X44916	real	BA47	gram	hjerte	target	1	0.761	0.126	0.508	2
1559	1559	X44916	real	BA47	gram	pil	target	1	0.71	0.148	0.422	2
1560	1560	X44916	real	BA47	gram	glas	target	1	0.862	0.162	0.67	2
1561	1561	X44916	real	BA47	lex	plus	filler	1	1.175	0.191	0.569	2
1562	1562	X44916	real	BA47	lex	pil	target	1	0.977	0.157	0.441	2
1563	1563	X44916	real	BA47	lex	brev	target	1	0.824	0.16	0.564	2
1564	1564	X44916	real	BA47	lex	firkant	filler	1	0.61	0.198	0.685	2
1565	1565	X44916	real	BA47	lex	trekant	target	1	0.638	0.166	0.649	2
1566	1566	X44916	real	BA47	lex	glas	target	1	0.631	0.171	0.739	2
1567	1567	X44916	real	BA47	lex	plus	target	1	0.588	0.223	0.742	2
1568	1568	X44916	real	BA47	lex	terning	target	1	0.674	0.195	0.576	2
1569	1569	X44916	real	BA47	lex	hus	target	1	0.664	0.151	0.667	2
1570	1570	X44916	real	BA47	lex	terning	filler	1	0.638	0.197	0.55	2
1571	1571	X44916	real	BA47	lex	baelte	target	1	0.725	0.162	0.555	2
1572	1572	X44916	real	BA47	lex	pil	target	1	0.797	0.18	0.411	2
1573	1573	X44916	real	BA47	lex	bold	filler	1	0.682	0.216	0.544	2
1574	1574	X44916	real	BA47	lex	minus	filler	1	0.678	0.234	0.76	2
1575	1575	X44916	real	BA47	lex	trekant	target	1	0.696	0.191	0.634	2
1576	1576	X44916	real	BA47	lex	minus	target	1	0.761	0.166	0.793	2
1577	1577	X44916	real	BA47	lex	skaal	target	1	0.876	0.213	0.558	2
1578	1578	X44916	real	BA47	lex	terning	target	1	0.78	0.197	0.532	2
1579	1579	X44916	real	BA47	lex	hjerte	target	1	0.844	0.144	0.562	2
1580	1580	X44916	real	BA47	lex	minus	target	1	0.664	0.159	0.749	2
1581	1581	X44916	real	BA47	lex	vindue	target	1	0.66	0.155	0.501	2
1582	1582	X44916	real	BA47	lex	vindue	target	1	0.768	0.173	0.519	2
1583	1583	X44916	real	BA47	lex	bold	target	1	0.649	0.155	0.429	2
1584	1584	X44916	real	BA47	lex	cirkel	target	1	0.714	0.159	0.436	2
1585	1585	X44916	real	BA47	lex	cirkel	target	1	0.653	0.182	0.47	2
1586	1586	X44916	real	BA47	lex	glas	filler	1	0.761	0.209	0.757	2
1587	1587	X44916	real	BA47	lex	baelte	target	1	0.696	0.141	0.544	2
1588	1588	X44916	real	BA47	lex	hus	target	1	0.703	0.153	0.637	2
1589	1589	X44916	real	BA47	lex	skaal	target	1	0.664	0.159	0.461	2
1590	1590	X44916	real	BA47	lex	brev	target	1	0.66	0.12	0.408	2
1591	1591	X44916	real	BA47	lex	cirkel	filler	1	0.606	0.195	0.584	2
1592	1592	X44916	real	BA47	lex	firkant	target	1	0.628	0.169	0.663	2
1593	1593	X44916	real	BA47	lex	hat	target	1	0.646	0.155	0.443	2
1594	1594	X44916	real	BA47	lex	hat	target	1	0.678	0.195	0.389	2
1595	1595	X44916	real	BA47	lex	bold	target	1	0.552	0.122	0.418	2
1596	1596	X44916	real	BA47	lex	hjerte	target	1	0.602	0.112	0.512	2
1597	1597	X44916	real	BA47	lex	glas	target	1	0.617	0.155	0.706	2
1598	1598	X44916	real	BA47	lex	plus	target	1	0.907	0.109	0.696	2
1599	1599	X44916	real	BA47	lex	brev	filler	1	0.685	0.18	0.58	2
1600	1600	X44916	real	BA47	lex	firkant	target	1	0.653	0.166	0.652	2
1601	1601	X83622	sham	BA47	gram	hat	target	1	1.074	0.317	0.608	1
1602	1602	X83622	sham	BA47	gram	hjerte	target	1	1.096	0.193	0.88	1
1603	1603	X83622	sham	BA47	gram	trekant	target	1	1.512	0.31	0.903	1
1604	1604	X83622	sham	BA47	gram	brev	target	1	1.206	0.302	0.725	1
1605	1605	X83622	sham	BA47	gram	plus	target	0	1.198	0.801	0.778	1
1606	1606	X83622	sham	BA47	gram	brev	target	1	1.039	0.267	0.733	1
1607	1607	X83622	sham	BA47	gram	hus	target	1	0.949	0.246	0.846	1
1608	1608	X83622	sham	BA47	gram	baelte	target	1	1.115	0.31	0.831	1
1609	1609	X83622	sham	BA47	gram	cirkel	target	1	1.625	0.34	0.808	1
1610	1610	X83622	sham	BA47	gram	glas	target	1	1.429	0.295	0.876	1
1611	1611	X83622	sham	BA47	gram	baelte	target	1	0.945	0.306	0.952	1
1612	1612	X83622	sham	BA47	gram	hjerte	target	1	1.013	0.329	0.82	1
1613	1613	X83622	sham	BA47	gram	bold	target	1	1.043	0.329	0.71	1
1614	1614	X83622	sham	BA47	gram	terning	target	1	0.955	0.279	0.859	1
1615	1615	X83622	sham	BA47	gram	hjerte	filler	1	1.334	0.389	0.888	1
1616	1616	X83622	sham	BA47	gram	hat	target	0	1.188	1.008	0.657	1
1617	1617	X83622	sham	BA47	gram	minus	target	1	1.456	0.336	1.004	1
1618	1618	X83622	sham	BA47	gram	vindue	target	1	0.941	0.306	0.793	1
1619	1619	X83622	sham	BA47	gram	pil	target	1	1.489	0.249	0.608	1
1620	1620	X83622	sham	BA47	gram	vindue	filler	1	0.934	0.408	0.929	1
1621	1621	X83622	sham	BA47	gram	pil	target	1	1.482	0.332	0.684	1
1622	1622	X83622	sham	BA47	gram	pil	filler	1	0.87	0.34	0.854	1
1623	1623	X83622	sham	BA47	gram	skaal	target	1	1.318	0.305	0.767	1
1624	1624	X83622	sham	BA47	gram	cirkel	target	1	0.906	0.367	0.836	1
1625	1625	X83622	sham	BA47	gram	glas	target	1	0.972	0.336	0.854	1
1626	1626	X83622	sham	BA47	gram	skaal	filler	1	0.96	0.374	0.91	1
1627	1627	X83622	sham	BA47	gram	terning	target	1	0.887	0.351	0.848	1
1628	1628	X83622	sham	BA47	gram	baelte	filler	1	1.139	0.309	0.832	1
1629	1629	X83622	sham	BA47	gram	bold	filler	1	0.821	0.393	0.869	1
1630	1630	X83622	sham	BA47	gram	firkant	target	1	0.979	0.351	0.944	1
1631	1631	X83622	sham	BA47	gram	firkant	target	1	1.183	0.374	0.997	1
1632	1632	X83622	sham	BA47	gram	vindue	target	1	1.02	0.248	0.851	1
1633	1633	X83622	sham	BA47	gram	hus	target	1	0.987	0.28	0.805	1
1634	1634	X83622	sham	BA47	gram	bold	target	1	0.983	0.257	0.703	1
1635	1635	X83622	sham	BA47	gram	minus	filler	1	0.936	0.363	0.958	1
1636	1636	X83622	sham	BA47	gram	hat	filler	1	0.917	0.397	0.725	1
1637	1637	X83622	sham	BA47	gram	plus	target	1	1.059	0.272	1.039	1
1638	1638	X83622	sham	BA47	gram	skaal	target	1	1.032	0.336	0.714	1
1639	1639	X83622	sham	BA47	gram	minus	target	1	0.917	0.332	0.874	1
1640	1640	X83622	sham	BA47	gram	trekant	target	1	1.474	0.332	1.02	1
1641	1641	X83622	sham	BA47	lex	baelte	filler	0	0.923	0.88	0.771	1
1642	1642	X83622	sham	BA47	lex	brev	target	1	1.051	0.298	0.661	1
1643	1643	X83622	sham	BA47	lex	vindue	filler	1	1.206	0.378	0.876	1
1644	1644	X83622	sham	BA47	lex	bold	target	1	1.261	0.378	0.752	1
1645	1645	X83622	sham	BA47	lex	cirkel	target	1	1.157	0.298	0.823	1
1646	1646	X83622	sham	BA47	lex	glas	target	1	1.761	0.263	0.832	1
1647	1647	X83622	sham	BA47	lex	cirkel	target	1	0.753	0.302	0.699	1
1648	1648	X83622	sham	BA47	lex	pil	target	1	1.215	0.305	0.989	1
1649	1649	X83622	sham	BA47	lex	hus	filler	1	1.07	0.412	0.869	1
1650	1650	X83622	sham	BA47	lex	terning	target	1	1.244	0.412	0.937	1
1651	1651	X83622	sham	BA47	lex	baelte	target	1	1.319	0.374	0.956	1
1652	1652	X83622	sham	BA47	lex	skaal	target	1	1.017	0.378	0.756	1
1653	1653	X83622	sham	BA47	lex	hjerte	filler	1	1.074	0.415	0.884	1
1654	1654	X83622	sham	BA47	lex	hat	target	1	1.043	0.397	0.699	1
1655	1655	X83622	sham	BA47	lex	hus	target	1	1.158	0.26	0.84	1
1656	1656	X83622	sham	BA47	lex	hjerte	target	1	1.172	0.298	0.729	1
1657	1657	X83622	sham	BA47	lex	glas	target	1	1.074	0.321	0.861	1
1658	1658	X83622	sham	BA47	lex	minus	target	1	1.028	0.279	0.924	1
1659	1659	X83622	sham	BA47	lex	trekant	target	1	1.013	0.321	0.846	1
1660	1660	X83622	sham	BA47	lex	skaal	filler	1	0.866	0.385	0.805	1
1661	1661	X83622	sham	BA47	lex	skaal	target	1	0.929	0.351	0.737	1
1662	1662	X83622	sham	BA47	lex	trekant	filler	1	0.891	0.363	0.901	1
1663	1663	X83622	sham	BA47	lex	plus	target	1	0.987	0.295	0.865	1
1664	1664	X83622	sham	BA47	lex	bold	target	1	1.025	0.332	0.71	1
1665	1665	X83622	sham	BA47	lex	plus	target	1	1.145	0.332	0.873	1
1666	1666	X83622	sham	BA47	lex	hat	target	1	0.829	0.355	0.618	1
1667	1667	X83622	sham	BA47	lex	brev	target	1	1.062	0.355	0.733	1
1668	1668	X83622	sham	BA47	lex	vindue	target	1	1.459	0.317	0.828	1
1669	1669	X83622	sham	BA47	lex	baelte	target	1	1.036	0.355	0.74	1
1670	1670	X83622	sham	BA47	lex	terning	target	1	0.964	0.276	0.74	1
1671	1671	X83622	sham	BA47	lex	firkant	target	1	1.036	0.34	0.916	1
1672	1672	X83622	sham	BA47	lex	vindue	target	1	1.576	0.272	0.733	1
1673	1673	X83622	sham	BA47	lex	pil	filler	1	0.806	0.37	0.74	1
1674	1674	X83622	sham	BA47	lex	minus	target	0	1.059	0.212	1.398	1
1675	1675	X83622	sham	BA47	lex	hat	filler	1	0.887	0.359	0.611	1
1676	1676	X83622	sham	BA47	lex	hjerte	target	1	1.342	0.283	0.782	1
1677	1677	X83622	sham	BA47	lex	pil	target	1	1.312	0.325	0.744	1
1678	1678	X83622	sham	BA47	lex	trekant	target	1	1.417	0.302	1.009	1
1679	1679	X83622	sham	BA47	lex	firkant	target	0	1.822	0.31	1.077	1
1680	1680	X83622	sham	BA47	lex	hus	target	1	1.017	0.276	0.782	1
1681	1681	X83622	sham	BA44	gram	glas	target	1	1.304	0.287	1.027	1
1682	1682	X83622	sham	BA44	gram	bold	target	1	0.964	0.348	0.812	1
1683	1683	X83622	sham	BA44	gram	baelte	target	1	1.13	0.272	0.884	1
1684	1684	X83622	sham	BA44	gram	trekant	target	1	0.832	0.393	1.107	1
1685	1685	X83622	sham	BA44	gram	skaal	target	1	1.047	0.321	0.846	1
1686	1686	X83622	sham	BA44	gram	minus	target	1	1.221	0.246	1.005	1
1687	1687	X83622	sham	BA44	gram	trekant	target	1	1.013	0.344	0.918	1
1688	1688	X83622	sham	BA44	gram	cirkel	target	1	1.263	0.276	0.865	1
1689	1689	X83622	sham	BA44	gram	bold	target	1	0.967	0.34	0.722	1
1690	1690	X83622	sham	BA44	gram	terning	target	1	1.062	0.317	0.916	1
1691	1691	X83622	sham	BA44	gram	cirkel	filler	1	1.331	0.389	0.918	1
1692	1692	X83622	sham	BA44	gram	vindue	target	1	1.284	0.271	0.962	1
1693	1693	X83622	sham	BA44	gram	hus	filler	1	1.025	0.404	1.095	1
1694	1694	X83622	sham	BA44	gram	pil	target	1	1.017	0.317	0.737	1
1695	1695	X83622	sham	BA44	gram	hjerte	target	1	1.032	0.279	0.84	1
1696	1696	X83622	sham	BA44	gram	firkant	filler	1	1.314	0.344	1.019	1
1697	1697	X83622	sham	BA44	gram	brev	target	1	0.949	0.287	0.691	1
1698	1698	X83622	sham	BA44	gram	plus	target	1	0.93	0.227	0.982	1
1699	1699	X83622	sham	BA44	gram	glas	filler	1	0.866	0.397	0.933	1
1700	1700	X83622	sham	BA44	gram	brev	target	1	0.955	0.218	0.706	1
1701	1701	X83622	sham	BA44	gram	firkant	target	1	1.176	0.351	0.944	1
1702	1702	X83622	sham	BA44	gram	cirkel	target	0	1.104	0.544	0.861	1
1703	1703	X83622	sham	BA44	gram	glas	target	1	0.917	0.283	0.935	1
1704	1704	X83622	sham	BA44	gram	minus	target	1	1.394	0.275	1.016	1
1705	1705	X83622	sham	BA44	gram	vindue	target	1	1.006	0.264	0.797	1
1706	1706	X83622	sham	BA44	gram	pil	target	0	1.013	0.37	1.02	1
1707	1707	X83622	sham	BA44	gram	brev	filler	1	1.07	0.434	0.952	1
1708	1708	X83622	sham	BA44	gram	hjerte	target	1	0.911	0.306	0.891	1
1709	1709	X83622	sham	BA44	gram	plus	target	1	1.02	0.267	0.859	1
1710	1710	X83622	sham	BA44	gram	trekant	filler	1	0.99	0.351	1.065	1
1711	1711	X83622	sham	BA44	gram	firkant	target	0	1.572	0.525	1.602	1
1712	1712	X83622	sham	BA44	gram	hat	target	1	1.338	0.302	0.585	1
1713	1713	X83622	sham	BA44	gram	terning	target	1	1.005	0.359	0.775	1
1714	1714	X83622	sham	BA44	gram	hus	target	1	0.968	0.238	0.823	1
1715	1715	X83622	sham	BA44	gram	terning	filler	1	1.051	0.385	0.861	1
1716	1716	X83622	sham	BA44	gram	baelte	target	1	1.108	0.218	0.771	1
1717	1717	X83622	sham	BA44	gram	hus	target	1	1.108	0.29	0.859	1
1718	1718	X83622	sham	BA44	gram	plus	filler	1	1.108	0.367	0.794	1
1719	1719	X83622	sham	BA44	gram	hat	target	1	1.356	0.325	0.596	1
1720	1720	X83622	sham	BA44	gram	skaal	target	1	1.021	0.366	0.778	1
1721	1721	X83622	sham	BA44	lex	baelte	target	1	1.02	0.221	0.741	1
1722	1722	X83622	sham	BA44	lex	trekant	target	0	2.88	0.252	0.859	1
1723	1723	X83622	sham	BA44	lex	terning	target	1	1.036	0.378	0.775	1
1724	1724	X83622	sham	BA44	lex	trekant	target	1	1.096	0.295	0.797	1
1725	1725	X83622	sham	BA44	lex	vindue	target	1	1.738	0.283	0.687	1
1726	1726	X83622	sham	BA44	lex	cirkel	target	1	0.889	0.321	0.687	1
1727	1727	X83622	sham	BA44	lex	pil	target	1	1.036	0.241	0.599	1
1728	1728	X83622	sham	BA44	lex	baelte	target	1	0.982	0.221	0.752	1
1729	1729	X83622	sham	BA44	lex	hjerte	target	1	0.934	0.272	0.778	1
1730	1730	X83622	sham	BA44	lex	cirkel	target	1	1.213	0.298	0.684	1
1731	1731	X83622	sham	BA44	lex	firkant	target	1	1.123	0.393	1.061	1
1732	1732	X83622	sham	BA44	lex	glas	target	1	1.259	0.268	0.944	1
1733	1733	X83622	sham	BA44	lex	hjerte	target	1	0.979	0.253	0.718	1
1734	1734	X83622	sham	BA44	lex	bold	target	1	1.24	0.329	0.68	1
1735	1735	X83622	sham	BA44	lex	vindue	target	1	1.297	0.306	0.857	1
1736	1736	X83622	sham	BA44	lex	bold	target	1	1.274	0.287	0.782	1
1737	1737	X83622	sham	BA44	lex	hus	target	1	0.987	0.246	0.808	1
1738	1738	X83622	sham	BA44	lex	glas	target	1	0.978	0.275	0.771	1
1739	1739	X83622	sham	BA44	lex	skaal	target	1	1.364	0.305	0.722	1
1740	1740	X83622	sham	BA44	lex	minus	filler	1	1.127	0.325	0.844	1
1741	1741	X83622	sham	BA44	lex	firkant	target	0	1.119	0.737	0.918	1
1742	1742	X83622	sham	BA44	lex	hat	target	1	0.923	0.238	0.638	1
1743	1743	X83622	sham	BA44	lex	brev	target	1	1.559	0.267	0.603	1
1744	1744	X83622	sham	BA44	lex	pil	target	1	1.184	0.378	0.63	1
1745	1745	X83622	sham	BA44	lex	terning	target	1	0.975	0.275	0.756	1
1746	1746	X83622	sham	BA44	lex	firkant	filler	1	1.219	0.347	0.935	1
1747	1747	X83622	sham	BA44	lex	plus	filler	1	0.929	0.435	0.87	1
1748	1748	X83622	sham	BA44	lex	plus	target	1	0.975	0.302	0.808	1
1749	1749	X83622	sham	BA44	lex	brev	filler	1	0.875	0.325	0.702	1
1750	1750	X83622	sham	BA44	lex	minus	target	1	1.41	0.28	0.918	1
1751	1751	X83622	sham	BA44	lex	terning	filler	1	1.059	0.351	0.825	1
1752	1752	X83622	sham	BA44	lex	glas	filler	1	0.802	0.363	0.789	1
1753	1753	X83622	sham	BA44	lex	hat	target	1	0.911	0.314	0.646	1
1754	1754	X83622	sham	BA44	lex	bold	filler	1	0.798	0.37	0.808	1
1755	1755	X83622	sham	BA44	lex	skaal	target	1	0.821	0.344	0.687	1
1756	1756	X83622	sham	BA44	lex	cirkel	filler	1	0.839	0.408	0.842	1
1757	1757	X83622	sham	BA44	lex	minus	target	1	0.86	0.241	0.882	1
1758	1758	X83622	sham	BA44	lex	brev	target	1	0.772	0.256	0.699	1
1759	1759	X83622	sham	BA44	lex	hus	target	1	1.005	0.241	0.802	1
1760	1760	X83622	sham	BA44	lex	plus	target	1	0.991	0.246	0.888	1
1761	1761	X83622	real	BA47	gram	glas	target	1	0.934	0.189	0.816	2
1762	1762	X83622	real	BA47	gram	bold	filler	1	0.817	0.321	0.687	2
1763	1763	X83622	real	BA47	gram	hus	target	1	0.889	0.162	0.763	2
1764	1764	X83622	real	BA47	gram	vindue	target	1	0.983	0.132	0.616	2
1765	1765	X83622	real	BA47	gram	plus	target	1	0.866	0.162	0.752	2
1766	1766	X83622	real	BA47	gram	brev	target	1	0.873	0.17	0.559	2
1767	1767	X83622	real	BA47	gram	hjerte	target	1	1.337	0.176	0.607	2
1768	1768	X83622	real	BA47	gram	hat	target	1	1.062	0.144	0.461	2
1769	1769	X83622	real	BA47	gram	brev	target	1	0.925	0.149	0.569	2
1770	1770	X83622	real	BA47	gram	baelte	target	1	0.832	0.17	0.676	2
1771	1771	X83622	real	BA47	gram	hat	target	1	1.215	0.149	0.519	2
1772	1772	X83622	real	BA47	gram	firkant	target	1	1.207	0.16	0.813	2
1773	1773	X83622	real	BA47	gram	minus	filler	1	1.077	0.261	0.869	2
1774	1774	X83622	real	BA47	gram	trekant	target	1	0.972	0.162	0.808	2
1775	1775	X83622	real	BA47	gram	vindue	filler	1	0.889	0.332	0.816	2
1776	1776	X83622	real	BA47	gram	terning	target	1	0.923	0.196	0.687	2
1777	1777	X83622	real	BA47	gram	baelte	filler	1	1.002	0.298	0.691	2
1778	1778	X83622	real	BA47	gram	skaal	target	1	1.04	0.14	0.608	2
1779	1779	X83622	real	BA47	gram	skaal	target	1	0.921	0.172	0.695	2
1780	1780	X83622	real	BA47	gram	pil	filler	1	0.929	0.313	0.718	2
1781	1781	X83622	real	BA47	gram	pil	target	1	1.41	0.157	0.592	2
1782	1782	X83622	real	BA47	gram	bold	target	1	1.025	0.125	0.631	2
1783	1783	X83622	real	BA47	gram	baelte	target	1	1.27	0.166	0.585	2
1784	1784	X83622	real	BA47	gram	cirkel	target	1	0.885	0.17	0.642	2
1785	1785	X83622	real	BA47	gram	pil	target	1	1.138	0.125	0.638	2
1786	1786	X83622	real	BA47	gram	hjerte	target	1	1.333	0.137	0.584	2
1787	1787	X83622	real	BA47	gram	trekant	target	1	1.323	0.14	0.789	2
1788	1788	X83622	real	BA47	gram	hjerte	filler	1	1.066	0.279	0.668	2
1789	1789	X83622	real	BA47	gram	glas	target	1	1.221	0.2	0.691	2
1790	1790	X83622	real	BA47	gram	vindue	target	1	1.062	0.166	0.657	2
1791	1791	X83622	real	BA47	gram	hat	filler	1	1.043	0.279	0.588	2
1792	1792	X83622	real	BA47	gram	terning	target	1	1.322	0.153	0.664	2
1793	1793	X83622	real	BA47	gram	minus	target	1	1.229	0.162	0.771	2
1794	1794	X83622	real	BA47	gram	bold	target	1	1.84	0.136	0.604	2
1795	1795	X83622	real	BA47	gram	firkant	target	1	1.153	0.174	0.767	2
1796	1796	X83622	real	BA47	gram	plus	target	1	1.039	0.195	0.764	2
1797	1797	X83622	real	BA47	gram	skaal	filler	1	1.04	0.291	0.752	2
1798	1798	X83622	real	BA47	gram	minus	target	1	1.066	0.179	0.821	2
1799	1799	X83622	real	BA47	gram	hus	target	1	0.983	0.174	0.706	2
1800	1800	X83622	real	BA47	gram	cirkel	target	1	1.051	0.144	0.767	2
1801	1801	X83622	real	BA47	lex	firkant	target	1	1.066	0.348	0.771	2
1802	1802	X83622	real	BA47	lex	hus	filler	1	1.036	0.321	0.687	2
1803	1803	X83622	real	BA47	lex	trekant	target	1	0.839	0.246	0.801	2
1804	1804	X83622	real	BA47	lex	terning	target	1	0.892	0.268	0.782	2
1805	1805	X83622	real	BA47	lex	pil	filler	1	0.719	0.306	0.691	2
1806	1806	X83622	real	BA47	lex	baelte	filler	1	0.877	0.321	0.737	2
1807	1807	X83622	real	BA47	lex	bold	target	1	0.813	0.268	0.752	2
1808	1808	X83622	real	BA47	lex	hus	target	1	0.839	0.159	0.721	2
1809	1809	X83622	real	BA47	lex	vindue	target	1	0.873	0.181	0.669	2
1810	1810	X83622	real	BA47	lex	bold	target	1	0.891	0.286	0.71	2
1811	1811	X83622	real	BA47	lex	plus	target	1	0.881	0.234	0.789	2
1812	1812	X83622	real	BA47	lex	firkant	target	1	1.032	0.249	0.823	2
1813	1813	X83622	real	BA47	lex	pil	target	1	0.715	0.295	0.646	2
1814	1814	X83622	real	BA47	lex	baelte	target	1	1.089	0.229	0.699	2
1815	1815	X83622	real	BA47	lex	glas	target	1	1.149	0.223	0.721	2
1816	1816	X83622	real	BA47	lex	trekant	filler	1	0.715	0.314	0.85	2
1817	1817	X83622	real	BA47	lex	skaal	filler	1	0.799	0.367	0.775	2
1818	1818	X83622	real	BA47	lex	skaal	target	1	1.2	0.275	0.691	2
1819	1819	X83622	real	BA47	lex	skaal	target	1	0.913	0.263	0.645	2
1820	1820	X83622	real	BA47	lex	hat	filler	1	1.02	0.313	0.561	2
1821	1821	X83622	real	BA47	lex	pil	target	1	0.91	0.305	0.622	2
1822	1822	X83622	real	BA47	lex	cirkel	target	1	0.982	0.229	0.691	2
1823	1823	X83622	real	BA47	lex	minus	target	1	1.184	0.244	0.89	2
1824	1824	X83622	real	BA47	lex	terning	target	1	1.059	0.314	0.714	2
1825	1825	X83622	real	BA47	lex	hat	target	1	0.883	0.275	0.531	2
1826	1826	X83622	real	BA47	lex	vindue	filler	1	0.821	0.321	0.782	2
1827	1827	X83622	real	BA47	lex	plus	target	1	0.784	0.237	0.779	2
1828	1828	X83622	real	BA47	lex	brev	target	1	0.787	0.256	0.596	2
1829	1829	X83622	real	BA47	lex	hjerte	target	1	0.822	0.191	0.668	2
1830	1830	X83622	real	BA47	lex	brev	target	1	0.896	0.212	0.665	2
1831	1831	X83622	real	BA47	lex	hjerte	target	1	0.798	0.223	0.714	2
1832	1832	X83622	real	BA47	lex	trekant	target	0	0.936	0.279	0.993	2
1833	1833	X83622	real	BA47	lex	glas	target	1	0.768	0.26	0.802	2
1834	1834	X83622	real	BA47	lex	vindue	target	1	0.87	0.219	0.687	2
1835	1835	X83622	real	BA47	lex	minus	target	1	0.948	0.183	0.851	2
1836	1836	X83622	real	BA47	lex	baelte	target	1	0.972	0.223	0.665	2
1837	1837	X83622	real	BA47	lex	cirkel	target	1	0.866	0.264	0.71	2
1838	1838	X83622	real	BA47	lex	hat	target	1	0.907	0.329	0.476	2
1839	1839	X83622	real	BA47	lex	hjerte	filler	1	0.856	0.367	0.687	2
1840	1840	X83622	real	BA47	lex	hus	target	1	0.866	0.242	0.691	2
1841	1841	X83622	real	BA44	gram	trekant	target	1	0.933	0.344	0.886	2
1842	1842	X83622	real	BA44	gram	hjerte	target	0	0.975	0.438	0.771	2
1843	1843	X83622	real	BA44	gram	firkant	filler	1	1.236	0.382	0.929	2
1844	1844	X83622	real	BA44	gram	trekant	filler	1	0.987	0.344	0.903	2
1845	1845	X83622	real	BA44	gram	baelte	target	1	1.024	0.199	0.752	2
1846	1846	X83622	real	BA44	gram	plus	filler	1	0.862	0.317	0.91	2
1847	1847	X83622	real	BA44	gram	brev	target	1	0.986	0.179	0.622	2
1848	1848	X83622	real	BA44	gram	baelte	target	1	1.154	0.183	0.699	2
1849	1849	X83622	real	BA44	gram	plus	target	1	1.234	0.233	0.744	2
1850	1850	X83622	real	BA44	gram	hus	target	1	1.217	0.23	0.835	2
1851	1851	X83622	real	BA44	gram	vindue	target	1	1.23	0.176	0.71	2
1852	1852	X83622	real	BA44	gram	hus	target	1	0.938	0.155	0.752	2
1853	1853	X83622	real	BA44	gram	terning	target	1	1.338	0.166	0.774	2
1854	1854	X83622	real	BA44	gram	hjerte	target	1	0.963	0.195	0.741	2
1855	1855	X83622	real	BA44	gram	cirkel	target	1	1.093	0.206	0.744	2
1856	1856	X83622	real	BA44	gram	pil	target	1	0.836	0.185	0.612	2
1857	1857	X83622	real	BA44	gram	glas	target	1	1.07	0.23	0.752	2
1858	1858	X83622	real	BA44	gram	cirkel	target	1	0.987	0.17	0.642	2
1859	1859	X83622	real	BA44	gram	bold	target	1	0.957	0.162	0.68	2
1860	1860	X83622	real	BA44	gram	pil	target	1	1.002	0.14	0.646	2
1861	1861	X83622	real	BA44	gram	bold	target	1	1.425	0.168	0.683	2
1862	1862	X83622	real	BA44	gram	firkant	target	1	0.933	0.157	0.817	2
1863	1863	X83622	real	BA44	gram	skaal	target	1	1.002	0.174	0.635	2
1864	1864	X83622	real	BA44	gram	brev	filler	1	0.949	0.325	0.695	2
1865	1865	X83622	real	BA44	gram	plus	target	1	1.089	0.151	0.687	2
1866	1866	X83622	real	BA44	gram	skaal	target	1	1.119	0.253	0.623	2
1867	1867	X83622	real	BA44	gram	minus	target	1	0.93	0.178	0.831	2
1868	1868	X83622	real	BA44	gram	hus	filler	1	1.013	0.329	0.789	2
1869	1869	X83622	real	BA44	gram	cirkel	filler	1	1.062	0.321	0.82	2
1870	1870	X83622	real	BA44	gram	glas	target	1	0.998	0.128	0.691	2
1871	1871	X83622	real	BA44	gram	brev	target	1	0.998	0.2	0.544	2
1872	1872	X83622	real	BA44	gram	terning	target	1	0.921	0.157	0.71	2
1873	1873	X83622	real	BA44	gram	firkant	target	1	0.964	0.17	0.827	2
1874	1874	X83622	real	BA44	gram	glas	filler	1	1.002	0.31	0.767	2
1875	1875	X83622	real	BA44	gram	hat	target	1	0.991	0.2	0.544	2
1876	1876	X83622	real	BA44	gram	minus	target	1	1.204	0.183	0.806	2
1877	1877	X83622	real	BA44	gram	vindue	target	1	1.062	0.181	0.669	2
1878	1878	X83622	real	BA44	gram	trekant	target	1	1.047	0.155	0.805	2
1879	1879	X83622	real	BA44	gram	hat	target	1	1.055	0.257	0.514	2
1880	1880	X83622	real	BA44	gram	terning	filler	1	0.906	0.34	0.779	2
1881	1881	X83622	real	BA44	lex	trekant	target	1	0.959	0.283	0.897	2
1882	1882	X83622	real	BA44	lex	glas	target	1	0.93	0.234	0.903	2
1883	1883	X83622	real	BA44	lex	terning	filler	1	0.952	0.481	0.886	2
1884	1884	X83622	real	BA44	lex	pil	target	1	0.987	0.287	0.623	2
1885	1885	X83622	real	BA44	lex	minus	filler	1	0.968	0.348	0.861	2
1886	1886	X83622	real	BA44	lex	bold	filler	1	0.868	0.367	0.756	2
1887	1887	X83622	real	BA44	lex	skaal	target	1	0.86	0.351	0.71	2
1888	1888	X83622	real	BA44	lex	glas	target	1	0.843	0.268	0.823	2
1889	1889	X83622	real	BA44	lex	baelte	target	1	0.948	0.263	0.683	2
1890	1890	X83622	real	BA44	lex	firkant	filler	1	1.039	0.363	0.844	2
1891	1891	X83622	real	BA44	lex	glas	filler	1	0.923	0.366	0.789	2
1892	1892	X83622	real	BA44	lex	vindue	target	1	1.017	0.223	0.835	2
1893	1893	X83622	real	BA44	lex	hjerte	target	1	0.982	0.294	0.806	2
1894	1894	X83622	real	BA44	lex	hus	target	1	0.978	0.29	0.825	2
1895	1895	X83622	real	BA44	lex	cirkel	target	1	1.157	0.325	0.789	2
1896	1896	X83622	real	BA44	lex	plus	target	1	1.009	0.234	0.85	2
1897	1897	X83622	real	BA44	lex	trekant	target	1	1.074	0.298	0.873	2
1898	1898	X83622	real	BA44	lex	bold	target	1	0.885	0.306	0.744	2
1899	1899	X83622	real	BA44	lex	firkant	target	1	1.12	0.29	0.912	2
1900	1900	X83622	real	BA44	lex	hat	target	1	0.986	0.294	0.58	2
1901	1901	X83622	real	BA44	lex	firkant	target	1	0.858	0.314	0.861	2
1902	1902	X83622	real	BA44	lex	hus	target	1	1.47	0.272	0.763	2
1903	1903	X83622	real	BA44	lex	terning	target	1	0.987	0.321	0.786	2
1904	1904	X83622	real	BA44	lex	brev	filler	1	0.934	0.34	0.771	2
1905	1905	X83622	real	BA44	lex	brev	target	1	0.953	0.204	0.638	2
1906	1906	X83622	real	BA44	lex	baelte	target	1	1.081	0.264	0.691	2
1907	1907	X83622	real	BA44	lex	skaal	target	1	0.933	0.347	0.737	2
1908	1908	X83622	real	BA44	lex	plus	filler	1	0.915	0.344	0.778	2
1909	1909	X83622	real	BA44	lex	terning	target	1	1.108	0.276	0.771	2
1910	1910	X83622	real	BA44	lex	plus	target	1	0.96	0.276	0.755	2
1911	1911	X83622	real	BA44	lex	minus	target	1	1.02	0.214	0.821	2
1912	1912	X83622	real	BA44	lex	cirkel	target	1	1.131	0.279	0.775	2
1913	1913	X83622	real	BA44	lex	bold	target	1	0.929	0.305	0.741	2
1914	1914	X83622	real	BA44	lex	hjerte	target	1	0.938	0.238	0.714	2
1915	1915	X83622	real	BA44	lex	hat	target	1	0.883	0.302	0.531	2
1916	1916	X83622	real	BA44	lex	brev	target	1	0.953	0.223	0.616	2
1917	1917	X83622	real	BA44	lex	minus	target	1	0.889	0.246	0.842	2
1918	1918	X83622	real	BA44	lex	pil	target	1	1.028	0.272	0.638	2
1919	1919	X83622	real	BA44	lex	cirkel	filler	1	1.158	0.344	0.863	2
1920	1920	X83622	real	BA44	lex	vindue	target	1	1.093	0.252	0.741	2
1921	1921	X71781	sham	BA47	gram	minus	filler	1	0.917	0.282	0.702	2
1922	1922	X71781	sham	BA47	gram	hat	target	1	1.024	0.179	0.538	2
1923	1923	X71781	sham	BA47	gram	cirkel	target	1	0.826	0.111	0.817	2
1924	1924	X71781	sham	BA47	gram	firkant	target	1	0.761	0.16	0.714	2
1925	1925	X71781	sham	BA47	gram	hus	target	1	0.668	0.093	0.737	2
1926	1926	X71781	sham	BA47	gram	hjerte	filler	1	0.734	0.279	0.664	2
1927	1927	X71781	sham	BA47	gram	bold	filler	1	0.776	0.298	0.939	2
1928	1928	X71781	sham	BA47	gram	bold	target	1	0.745	0.16	0.66	2
1929	1929	X71781	sham	BA47	gram	pil	target	1	0.669	0.115	0.618	2
1930	1930	X71781	sham	BA47	gram	hus	target	1	0.684	0.135	0.675	2
1931	1931	X71781	sham	BA47	gram	firkant	target	1	0.831	0.158	0.81	2
1932	1932	X71781	sham	BA47	gram	hat	filler	1	0.746	0.27	0.733	2
1933	1933	X71781	sham	BA47	gram	trekant	target	1	0.673	0.168	0.798	2
1934	1934	X71781	sham	BA47	gram	hat	target	1	0.68	0.137	0.511	2
1935	1935	X71781	sham	BA47	gram	vindue	target	1	0.827	0.096	0.718	2
1936	1936	X71781	sham	BA47	gram	vindue	filler	1	0.768	0.233	0.725	2
1937	1937	X71781	sham	BA47	gram	baelte	target	1	0.73	0.115	0.71	2
1938	1938	X71781	sham	BA47	gram	trekant	target	1	0.669	0.179	0.809	2
1939	1939	X71781	sham	BA47	gram	vindue	target	1	0.665	0.112	0.656	2
1940	1940	X71781	sham	BA47	gram	glas	target	1	0.68	0.085	0.76	2
1941	1941	X71781	sham	BA47	gram	plus	target	1	0.614	0.112	0.783	2
1942	1942	X71781	sham	BA47	gram	terning	target	1	0.645	0.15	0.718	2
1943	1943	X71781	sham	BA47	gram	minus	target	1	0.641	0.131	0.802	2
1944	1944	X71781	sham	BA47	gram	brev	target	1	0.726	0.093	0.675	2
1945	1945	X71781	sham	BA47	gram	hjerte	target	1	0.631	0.115	0.645	2
1946	1946	X71781	sham	BA47	gram	cirkel	target	1	0.927	0.15	0.671	2
1947	1947	X71781	sham	BA47	gram	plus	target	1	0.719	0.076	0.729	2
1948	1948	X71781	sham	BA47	gram	brev	target	1	0.566	0.115	0.615	2
1949	1949	X71781	sham	BA47	gram	bold	target	1	0.661	0.127	0.54	2
1950	1950	X71781	sham	BA47	gram	baelte	target	1	0.635	0.115	0.672	2
1951	1951	X71781	sham	BA47	gram	glas	target	1	0.589	0.088	0.721	2
1952	1952	X71781	sham	BA47	gram	pil	target	1	0.608	0.134	0.592	2
1953	1953	X71781	sham	BA47	gram	hjerte	target	1	0.676	0.096	0.621	2
1954	1954	X71781	sham	BA47	gram	pil	filler	1	0.619	0.279	0.668	2
1955	1955	X71781	sham	BA47	gram	baelte	filler	1	0.596	0.218	0.687	2
1956	1956	X71781	sham	BA47	gram	minus	target	1	0.638	0.149	0.771	2
1957	1957	X71781	sham	BA47	gram	skaal	target	1	0.654	0.145	0.599	2
1958	1958	X71781	sham	BA47	gram	skaal	target	1	0.865	0.166	0.594	2
1959	1959	X71781	sham	BA47	gram	terning	target	1	0.616	0.153	0.641	2
1960	1960	X71781	sham	BA47	gram	skaal	filler	1	0.688	0.263	0.748	2
1961	1961	X71781	sham	BA47	lex	trekant	target	1	0.925	0.218	0.87	2
1962	1962	X71781	sham	BA47	lex	baelte	target	1	0.761	0.141	0.595	2
1963	1963	X71781	sham	BA47	lex	firkant	target	1	0.642	0.168	0.718	2
1964	1964	X71781	sham	BA47	lex	baelte	target	1	0.822	0.176	0.527	2
1965	1965	X71781	sham	BA47	lex	minus	filler	1	0.684	0.228	0.667	2
1966	1966	X71781	sham	BA47	lex	hus	target	1	0.658	0.172	0.657	2
1967	1967	X71781	sham	BA47	lex	minus	target	1	0.707	0.164	0.744	2
1968	1968	X71781	sham	BA47	lex	cirkel	target	1	0.845	0.282	0.657	2
1969	1969	X71781	sham	BA47	lex	terning	target	1	0.551	0.206	0.584	2
1970	1970	X71781	sham	BA47	lex	glas	target	1	0.532	0.168	0.809	2
1971	1971	X71781	sham	BA47	lex	hjerte	target	1	0.764	0.198	0.557	2
1972	1972	X71781	sham	BA47	lex	hat	target	1	0.642	0.233	0.519	2
1973	1973	X71781	sham	BA47	lex	minus	target	1	0.642	0.176	0.779	2
1974	1974	X71781	sham	BA47	lex	terning	target	1	0.738	0.202	0.58	2
1975	1975	X71781	sham	BA47	lex	cirkel	target	1	0.589	0.202	0.626	2
1976	1976	X71781	sham	BA47	lex	hjerte	target	1	0.603	0.158	0.637	2
1977	1977	X71781	sham	BA47	lex	brev	target	1	0.684	0.149	0.649	2
1978	1978	X71781	sham	BA47	lex	pil	target	1	0.711	0.187	0.531	2
1979	1979	X71781	sham	BA47	lex	cirkel	filler	1	0.738	0.267	0.645	2
1980	1980	X71781	sham	BA47	lex	skaal	target	1	0.676	0.208	0.59	2
1981	1981	X71781	sham	BA47	lex	bold	filler	1	0.541	0.239	0.617	2
1982	1982	X71781	sham	BA47	lex	brev	target	1	0.657	0.201	0.505	2
1983	1983	X71781	sham	BA47	lex	plus	filler	1	0.657	0.212	0.544	2
1984	1984	X71781	sham	BA47	lex	bold	target	1	0.68	0.204	0.594	2
1985	1985	X71781	sham	BA47	lex	vindue	target	1	0.73	0.16	0.592	2
1986	1986	X71781	sham	BA47	lex	hat	target	1	0.684	0.24	0.538	2
1987	1987	X71781	sham	BA47	lex	hus	target	1	0.715	0.176	0.71	2
1988	1988	X71781	sham	BA47	lex	trekant	target	1	0.543	0.172	0.691	2
1989	1989	X71781	sham	BA47	lex	plus	target	1	0.608	0.198	0.691	2
1990	1990	X71781	sham	BA47	lex	bold	target	1	0.719	0.225	0.641	2
1991	1991	X71781	sham	BA47	lex	firkant	target	1	0.915	0.22	0.745	2
1992	1992	X71781	sham	BA47	lex	glas	filler	1	0.642	0.279	0.756	2
1993	1993	X71781	sham	BA47	lex	brev	filler	1	0.645	0.266	0.64	2
1994	1994	X71781	sham	BA47	lex	firkant	filler	1	0.657	0.274	0.837	2
1995	1995	X71781	sham	BA47	lex	pil	target	1	0.634	0.231	0.598	2
1996	1996	X71781	sham	BA47	lex	plus	target	1	0.826	0.176	0.626	2
1997	1997	X71781	sham	BA47	lex	skaal	target	1	0.58	0.239	0.617	2
1998	1998	X71781	sham	BA47	lex	vindue	target	1	0.585	0.16	0.714	2
1999	1999	X71781	sham	BA47	lex	terning	filler	1	0.638	0.228	0.81	2
[truncated: 6,161 more rows]
